# Supplementary material for: Ionic liquids promote PCR amplification of DNA
Source: Royal Society of Chemistry journal article supplement (doi:10.1039/c2cc31740k), 2012-01-01

## E-Supporting Information-2 (ESI-2)

### Ionic liquids promote PCR amplification of DNA†

Yugang Shi,<sup>ab</sup> Yen-Liang Liu,<sup>a</sup> Peng-Yeh Lai,<sup>c</sup> Ming-Chung Tseng,<sup>a</sup> Min-Jen Tseng,<sup>c</sup>

Yudong Li,<sup>b</sup> and Yen-Ho Chu<sup>\*a</sup>

<sup>a</sup> Department of Chemistry and Biochemistry, National Chung Cheng University,  
Minhsiung, Chiayi 62102, Taiwan, ROC

<sup>b</sup> College of Food Science and Biotechnology, Zhejiang Provincinal Key Laboratory  
of Food Safety, Zhejiang Gongshang University, Hangzhou, Zhejiang 310035, PRC

<sup>c</sup> Institute of Molecular Biology, National Chung Cheng University, Minhsiung,  
Chiayi 62102, Taiwan, ROC

\* Corresponding author. Tel: 886 52428148; fax: 886 52721040; e-mail:

[cheyhc@ccu.edu.tw](mailto:cheyhc@ccu.edu.tw)

### Synthesis of 1,3-dimethylimidazolium iodide (**1a**)

The preparation of 1,3-dimethylimidazolium iodide (**1a**) was made following the literature method.<sup>1</sup> To an ice-cooled solution of 1-methylimidazole (164 mg, 2.00 mmol) in acetonitrile (2 mL) was added iodomethane (313 mg, 2.2 mmol). The alkylation reaction was carried out at 0 °C for 1 h. After the reaction, the solvent was removed under reduced pressure and the residue was then washed three times with diethyl ether (2 mL). The residual ether was removed *in vacuo* to afford the desired product **1a**.

<sup>1</sup>H NMR (200 MHz, DMSO-*d*<sub>6</sub>) δ 3.85 (s, 2 × CH<sub>3</sub>, 6H), 7.69 (d, *J* = 1.4 Hz, Im, 2H), 9.05 (s, Im, 1H); <sup>13</sup>C NMR (50 MHz, DMSO-*d*<sub>6</sub>) δ 35.8, 123.2, 136.8; FAB-HRMS *m/z* [M]<sup>+</sup> calcd for C<sub>5</sub>H<sub>9</sub>N<sub>2</sub> 97.0760, found 97.0768.

### Synthesis of 1-alkyl-3-methylimidazolium ionic liquids (**1b-f**)

1-Alkyl-3-methylimidazolium ionic liquids (**1b-f**) were prepared by following our previously reported procedure.<sup>2</sup> To a solution of 1-methylimidazole (164 mg, 2.00 mmol) in acetonitrile (2 mL) was added alkyl halide (2.2 mmol). The alkylation reaction was allowed to proceed at 80 °C for 2 h. After the reaction, the solvent was removed under reduced pressure and the residue was then washed three times with diethyl ether (2 mL). The residual ether was removed *in vacuo* to finally afford the desired ionic liquids **1b-f**.

**1b**, colorless liquid; <sup>1</sup>H NMR (200 MHz, DMSO-*d*<sub>6</sub>) δ 1.41 (t, *J* = 7.2 Hz, CH<sub>3</sub>, 3H),

3.85 (s, NCH<sub>3</sub>, 3H), 4.20 (q,  $J = 7.2$  Hz, NCH<sub>2</sub>, 2H), 7.71 (s, Im, 1H), 7.80 (s, Im, 1H), 9.19 (s, Im, 1H); <sup>13</sup>C NMR (50 MHz, DMSO-*d*<sub>6</sub>)  $\delta$  15.1, 35.6, 44.0, 121.8, 123.4, 136.1; FAB-HRMS  $m/z$  [M]<sup>+</sup> calcd for C<sub>6</sub>H<sub>11</sub>N<sub>2</sub> 111.0917, found 111.0922.

**1c**, colorless liquid; <sup>1</sup>H NMR (200 MHz, CDCl<sub>3</sub>)  $\delta$  1.00 (t,  $J = 7.4$  Hz, CH<sub>3</sub>, 3H), 1.98 (sx,  $J = 7.2$  Hz, CH<sub>2</sub>, 2H), 4.14 (s, NCH<sub>3</sub>, 3H), 4.32 (t,  $J = 7.2$  Hz, NCH<sub>2</sub>, 2H), 7.48 (s, Im, 1H), 7.57 (s, Im, 1H), 10.39 (s, Im, 1H); <sup>13</sup>C NMR (50 MHz, CDCl<sub>3</sub>)  $\delta$  10.2, 23.2, 36.2, 50.9, 121.9, 123.3, 136.4; FAB-HRMS  $m/z$  [M]<sup>+</sup> calcd for C<sub>7</sub>H<sub>13</sub>N<sub>2</sub> 125.1073, found 125.1077.

**1d**, colorless liquid; <sup>1</sup>H NMR (200 MHz, CDCl<sub>3</sub>)  $\delta$  0.97 (t,  $J = 7.2$  Hz, CH<sub>3</sub>, 3H), 1.40 (sx,  $J = 7.4$  Hz, CH<sub>2</sub>, 2H), 1.92 (qn,  $J = 7.4$  Hz, CH<sub>2</sub>, 2H), 4.14 (s, NCH<sub>3</sub>, 3H), 4.35 (t,  $J = 7.4$  Hz, NCH<sub>2</sub>, 2H), 7.42 (s, Im, 1H), 7.53 (s, Im, 1H), 10.45 (s, Im, 1H); <sup>13</sup>C NMR (50 MHz, CDCl<sub>3</sub>)  $\delta$  13.0, 18.9, 31.7, 36.2, 49.3, 121.8, 123.4, 136.5.

**1e**, colorless liquid; <sup>1</sup>H NMR (200 MHz, CDCl<sub>3</sub>)  $\delta$  0.90 (t,  $J = 6.6$  Hz, CH<sub>3</sub>, 3H), 1.22-1.49 (m, 2  $\times$  CH<sub>2</sub>, 4H), 1.93 (qn,  $J = 7.2$  Hz, CH<sub>2</sub>, 2H), 4.14 (s, NCH<sub>3</sub>, 3H), 4.34 (t,  $J = 7.4$  Hz, NCH<sub>2</sub>, 2H), 7.40 (s, Im, 1H), 7.53 (s, Im, 1H), 10.45 (s, Im, 1H); <sup>13</sup>C NMR (50 MHz, CDCl<sub>3</sub>)  $\delta$  13.3, 21.4, 27.6, 29.4, 36.1, 49.4, 121.7, 123.3, 136.3; FAB-HRMS  $m/z$  [M]<sup>+</sup> calcd for C<sub>9</sub>H<sub>17</sub>N<sub>2</sub> 153.1386, found 153.1391.

**1f** colorless liquid; <sup>1</sup>H NMR (200 MHz, CDCl<sub>3</sub>)  $\delta$  0.88 (t,  $J = 6.6$  Hz, CH<sub>3</sub>, 3H), 1.32 (bs, 3  $\times$  CH<sub>2</sub>, 6H), 1.91 (bs, CH<sub>2</sub>, 2H), 4.14 (s, NCH<sub>3</sub>, 3H), 4.33 (t,  $J = 7.4$  Hz, NCH<sub>2</sub>, 2H), 7.35 (s, Im, 1H), 7.47 (s, Im, 1H), 10.50 (s, Im, 1H); <sup>13</sup>C NMR (50 MHz, CDCl<sub>3</sub>)  $\delta$  13.6, 22.0, 25.5, 29.9, 30.7, 36.3, 49.7, 121.8, 123.5, 136.7; FAB-HRMS  $m/z$  [M]<sup>+</sup> calcd for C<sub>10</sub>H<sub>19</sub>N<sub>2</sub> 167.1543, found 167.1546.

### Synthesis of 1,2,3-trimethylimidazolium iodide (**2a**)

The preparation of 1,2,3-trimethylimidazolium iodide (**2a**) was made following the literature method.<sup>1</sup> To an ice-cooled solution of 1,2-dimethylimidazole (100 mg, 1.04 mmol) in acetonitrile (2 mL) was added iodomethane (177 mg, 1.25 mmol). The alkylation reaction was carried out at 0 °C for 1 h. After the reaction, the solvent was removed under reduced pressure and then the residue was washed three times with diethyl ether (2 mL). The residual ether was removed *in vacuo* to afford the desired product **2a**.

**2a**, yellow solid (mp 317-319 °C); <sup>1</sup>H NMR (200 MHz, DMSO-*d*<sub>6</sub>) δ 2.55 (s, N=CCH<sub>3</sub>, 3H), 3.75 (s, 2 × NCH<sub>3</sub>, 6H), 7.58(s, Im, 2H); <sup>13</sup>C NMR (50 MHz, DMSO-*d*<sub>6</sub>) δ 9.3, 34.7, 121.8, 144.6; FAB-HRMS *m/z* [M]<sup>+</sup> calcd for C<sub>6</sub>H<sub>11</sub>N<sub>2</sub> 111.0917, found 111.0923.

### Synthesis of 1-alkyl-2,3-dimethyleneimidazolium ionic liquids (**2b-f**)

1-Alkyl-2,3-dimethylimidazolium ionic liquids (**2b-f**) were prepared as described previously.<sup>2</sup> To a solution of 1,2-dimethylimidazole (100 mg, 1.04 mmol) in acetonitrile (2 mL) was added alkyl halide (1.25 mmol). The alkylation reaction was allowed to proceed at 80 °C for 2 h. After the reaction, the solvent was removed under reduced pressure and then the residue was washed three times with diethyl ether (2 mL). The residual ether was removed *in vacuo* to finally afford the desired ionic liquids **2b-f**.

**2b**, white solid (mp 58-62 °C);  $^1\text{H}$  NMR (200 MHz,  $\text{DMSO-}d_6$ )  $\delta$  1.33 (t,  $J = 7.4$  Hz,  $\text{CH}_3$ , 3H), 2.59 (s,  $\text{N}=\text{CCH}_3$ , 3H), 3.75 (s,  $\text{NCH}_3$ , 3H), 4.14 (q,  $J = 7.2$  Hz,  $\text{NCH}_2$ , 2H), 7.64 (d,  $J = 2.0$  Hz, Im, 1H), 7.68 (d,  $J = 2.2$  Hz, Im, 1H);  $^{13}\text{C}$  NMR (50 MHz,  $\text{DMSO-}d_6$ )  $\delta$  9.2, 14.8, 34.7, 42.7, 120.2, 122.3, 144.0; FAB-HRMS  $m/z$   $[\text{M}]^+$  calcd for  $\text{C}_7\text{H}_{13}\text{N}_2$  125.1073, found 125.1079.

**2c**, white solid (mp 48-54 °C);  $^1\text{H}$  NMR (200 MHz,  $\text{CDCl}_3$ )  $\delta$  0.97 (t,  $J = 7.4$  Hz,  $\text{CH}_3$ , 3H), 1.81 (sx,  $J = 7.4$  Hz,  $\text{CH}_2$ , 2H), 2.78 (s,  $\text{N}=\text{CCH}_3$ , 3H), 3.99 (s,  $\text{NCH}_3$ , 3H), 4.15 (t,  $J = 7.4$  Hz,  $\text{NCH}_2$ , 2H), 7.48 (d,  $J = 2.0$  Hz, Im, 1H), 7.67 (d,  $J = 1.8$  Hz, Im, 1H);  $^{13}\text{C}$  NMR (50 MHz,  $\text{CDCl}_3$ )  $\delta$  10.4, 10.5, 22.8, 35.7, 49.9, 121.0, 122.6, 143.2; FAB-HRMS  $m/z$   $[\text{M}]^+$  calcd for  $\text{C}_8\text{H}_{15}\text{N}_2$  139.1230, found 139.1232.

**2d**, white solid (mp 83-87 °C);  $^1\text{H}$  NMR (200 MHz,  $\text{CDCl}_3$ )  $\delta$  0.92 (t,  $J = 7.4$  Hz,  $\text{CH}_3$ , 3H), 1.35 (sx,  $J = 7.8$  Hz,  $\text{CH}_2$ , 2H), 1.77 (qn,  $J = 7.4$  Hz,  $\text{CH}_2$ , 2H), 2.78 (s,  $\text{N}=\text{CCH}_3$ , 3H), 3.99 (s,  $\text{NCH}_3$ , 3H), 4.17 (t,  $J = 7.4$  Hz,  $\text{NCH}_2$ , 2H), 7.46 (d,  $J = 2.0$  Hz, Im, 1H), 7.69 (d,  $J = 2.0$  Hz, Im, 1H);  $^{13}\text{C}$  NMR (50 MHz,  $\text{CDCl}_3$ )  $\delta$  10.4, 13.0, 19.0, 31.3, 35.7, 48.2, 120.8, 122.5, 143.1.

**2e**, colorless liquid;  $^1\text{H}$  NMR (200 MHz,  $\text{CDCl}_3$ )  $\delta$  0.87 (t,  $J = 6.6$  Hz,  $\text{CH}_3$ , 3H), 1.20-1.38 (m,  $2 \times \text{CH}_2$ , 4H), 1.79 (qn,  $J = 7.2$  Hz,  $\text{CH}_2$ , 2H), 2.76 (s,  $\text{N}=\text{CCH}_3$ , 3H), 3.98 (s,  $\text{NCH}_3$ , 3H), 4.15 (t,  $J = 7.4$  Hz,  $\text{NCH}_2$ , 2H), 7.39 (d,  $J = 2.0$  Hz, Im, 1H), 7.64 (d,  $J = 2.0$  Hz, Im, 1H);  $^{13}\text{C}$  NMR (50 MHz,  $\text{CDCl}_3$ )  $\delta$  10.6, 13.6, 21.9, 28.1, 29.3, 36.0, 48.7, 120.9, 122.9, 143.5; FAB-HRMS  $m/z$   $[\text{M}]^+$  calcd for  $\text{C}_{10}\text{H}_{19}\text{N}_2$  167.1543, found 167.1550.

**2f**, colorless liquid;  $^1\text{H}$  NMR (200 MHz,  $\text{CDCl}_3$ )  $\delta$  0.85 (t,  $J = 6.4$  Hz,  $\text{CH}_3$ , 3H), 1.28

(bs,  $3 \times \text{CH}_2$ , 6H), 1.68-1.89 (m,  $\text{CH}_2$ , 2H), 2.78 (s,  $\text{N}=\text{CCH}_3$ , 3H), 4.00 (s,  $\text{NCH}_3$ , 3H), 4.16 (t,  $J = 7.6$  Hz,  $\text{NCH}_2$ , 2H), 7.41 (d,  $J = 2.0$  Hz, Im, 1H), 7.69 (d,  $J = 1.8$  Hz, Im, 1H);  $^{13}\text{C}$  NMR (50 MHz,  $\text{CDCl}_3$ )  $\delta$  10.4, 13.4, 21.8, 25.4, 29.3, 30.5, 35.6, 48.4, 120.7, 122.5, 143.0; FAB-HRMS  $m/z$   $[\text{M}]^+$  calcd for  $\text{C}_{11}\text{H}_{21}\text{N}_2$  181.1699, found 181.1701.

### Synthesis of 1-methyl-2,3-trimethyleneimidazolium iodide (**3a**)

1-Methyl-2,3-trimethyleneimidazolium iodide (**3a**) was prepared as described previously.<sup>3</sup> To an ice-cooled solution of 6,7-dihydro-5*H*-pyrrolo[1,2-*a*]imidazole (100 mg, 0.93 mmol) in acetonitrile (2 mL) was added iodomethane (145 mg, 1.02 mmol). The alkylation reaction was carried out at 0 °C for 1 h. After the reaction, the solvent was removed under reduced pressure and the residue was washed three times with diethyl ether (2 mL). The residual ether was removed *in vacuo* to afford the desired product **3a**.

**3a**, white solid (mp 196-200 °C);  $^1\text{H}$  NMR (200 MHz,  $\text{DMSO}-d_6$ )  $\delta$  2.66 (qn,  $J = 7.0$  Hz,  $\text{CH}_2$ , 2H), 3.13 (t,  $J = 7.6$  Hz,  $\text{N}=\text{CCH}_2$ , 2H), 3.74 (s,  $\text{NCH}_3$ , 3H), 4.19 (t,  $J = 7.4$  Hz,  $\text{NCH}_2$ , 2H), 7.59 (d,  $J = 3.8$  Hz, Im, 2H);  $^{13}\text{C}$  NMR (50 MHz,  $\text{DMSO}-d_6$ )  $\delta$  22.4, 25.6, 34.9, 47.9, 117.6, 126.6, 152.7; FAB-HRMS  $m/z$   $[\text{M}]^+$  calcd for  $\text{C}_7\text{H}_{11}\text{N}_2$  123.0917, found 123.0919.

### Synthesis of 1-alkyl-2,3-trimethyleneimidazolium ionic liquids (**3b-f**)

1-Alkyl-2,3-trimethyleneimidazolium ionic liquids (**3b-f**) were prepared as described

previously.<sup>3</sup> To a solution of 6,7-dihydro-5*H*-pyrrolo[1,2-*a*]imidazole (100 mg, 0.93 mmol) in acetonitrile (2 mL) was added alkyl halide (1.02 mmol). The alkylation reaction was allowed to proceed at 80 °C for 2 h. After the reaction, the solvent was removed and the residue was then washed three times with diethyl ether (2 mL). The residual ether was removed *in vacuo* to finally afford the desired ionic liquids **3b-f**.

**3b** white solid m(mp 135-138 °C); <sup>1</sup>H NMR (200 MHz, CDCl<sub>3</sub>) δ 1.56 (t, *J* = 7.4 Hz, CH<sub>3</sub>, 3H), 2.92 (qn, *J* = 7.2 Hz, CH<sub>2</sub>, 2H), 3.48 (t, *J* = 7.6 Hz, N=CCH<sub>2</sub>, 2H), 4.31 (q, *J* = 7.4 Hz, NCH<sub>2</sub>, 2H), 4.45 (t, *J* = 7.2 Hz, NCH<sub>2</sub>, 2H), 7.56 (d, *J* = 2.0 Hz, Im, 1H), 7.58 (d, *J* = 2.0 Hz, Im, 1H); <sup>13</sup>C NMR (50 MHz, CDCl<sub>3</sub>) δ 14.9, 23.6, 25.9, 44.5, 48.3, 118.1, 125.2, 151.5; FAB-HRMS *m/z* [M]<sup>+</sup> calcd for C<sub>8</sub>H<sub>13</sub>N<sub>2</sub> 137.1073, found 137.1082.

**3c**, white solid (mp 83-88 °C); <sup>1</sup>H NMR (200 MHz, CDCl<sub>3</sub>) δ 1.01 (t, *J* = 7.4 Hz, CH<sub>3</sub>, 3H), 1.93 (sx, *J* = 7.4 Hz, CH<sub>2</sub>, 2H), 2.93 (qn, *J* = 7.2 Hz, CH<sub>2</sub>, 2H), 3.45 (t, *J* = 7.8 Hz, N=CCH<sub>2</sub>, 2H), 4.19 (t, *J* = 7.2 Hz, NCH<sub>2</sub>, 2H), 4.47 (t, *J* = 7.4 Hz, NCH<sub>2</sub>, 2H), 7.52 (d, *J* = 2.0 Hz, Im, 1H), 7.59 (d, *J* = 2.0 Hz, Im, 1H); <sup>13</sup>C NMR (50 MHz, CDCl<sub>3</sub>) δ 10.5, 22.8, 23.4, 25.8, 48.3, 50.6, 118.0, 125.6, 151.5; FAB-HRMS *m/z* [M]<sup>+</sup> calcd for C<sub>9</sub>H<sub>15</sub>N<sub>2</sub> 151.1230, found 151.1235.

**3d**, colorless liquid; <sup>1</sup>H NMR (200 MHz, CDCl<sub>3</sub>) δ 0.97 (t, *J* = 7.2 Hz, CH<sub>3</sub>, 3H), 1.40 (sx, *J* = 7.4 Hz, CH<sub>2</sub>, 2H), 1.82 (qn, *J* = 7.6 Hz, CH<sub>2</sub>, 2H), 2.93 (qn, *J* = 7.2 Hz, CH<sub>2</sub>, 2H), 3.44 (t, *J* = 7.6 Hz, N=CCH<sub>2</sub>, 2H), 4.22 (t, *J* = 7.2 Hz, NCH<sub>2</sub>, 2H), 4.47 (t, *J* = 7.4 Hz, NCH<sub>2</sub>, 2H), 7.49 (d, *J* = 2.2 Hz, Im, 1H), 7.59 (d, *J* = 2.0 Hz, Im, 1H); <sup>13</sup>C

NMR (50 MHz, CDCl<sub>3</sub>)  $\delta$  13.1, 19.2, 23.4, 25.8, 31.3, 48.3, 49.0, 118.1, 125.5, 151.5;

FAB-HRMS  $m/z$  [M]<sup>+</sup> calcd for C<sub>10</sub>H<sub>17</sub>N<sub>2</sub> 165.1386, found 165.1391.

**3e**, colorless liquid; <sup>1</sup>H NMR (200 MHz, CDCl<sub>3</sub>)  $\delta$  0.92 (t,  $J$  = 6.8 Hz, CH<sub>3</sub>, 3H), 1.22-1.45 (m, 2  $\times$  CH<sub>2</sub>, 4H), 1.88 (qn,  $J$  = 7.6 Hz, CH<sub>2</sub>, 2H), 2.93 (qn,  $J$  = 7.0 Hz, CH<sub>2</sub>, 2H), 3.44 (t,  $J$  = 7.6 Hz, N=CCH<sub>2</sub>, 2H), 4.19 (t,  $J$  = 7.2 Hz, NCH<sub>2</sub>, 2H), 4.47 (t,  $J$  = 7.4 Hz, NCH<sub>2</sub>, 2H), 7.42 (d,  $J$  = 1.8 Hz, Im, 1H), 7.55 (d,  $J$  = 2.2 Hz, Im, 1H); <sup>13</sup>C NMR (50 MHz, CDCl<sub>3</sub>)  $\delta$  13.5, 21.8, 23.5, 25.9, 28.1, 29.1, 48.4, 49.3, 118.2, 125.5, 151.6; FAB-HRMS  $m/z$  [M]<sup>+</sup> calcd for C<sub>11</sub>H<sub>19</sub>N<sub>2</sub> 179.1543, found 179.1545.

**3f**, white solid (mp 76-79 °C); <sup>1</sup>H NMR (200 MHz, CDCl<sub>3</sub>)  $\delta$  0.89 (t,  $J$  = 6.4 Hz, CH<sub>3</sub>, 3H), 1.20-1.48 (m, 3  $\times$  CH<sub>2</sub>, 6H), 1.64-1.97 (m, CH<sub>2</sub>, 2H), 2.93 (qn,  $J$  = 7.0 Hz, CH<sub>2</sub>, 2H), 3.44 (t,  $J$  = 7.4 Hz, N=CCH<sub>2</sub>, 2H), 4.20 (t,  $J$  = 7.4 Hz, NCH<sub>2</sub>, 2H), 4.47 (t,  $J$  = 7.4 Hz, NCH<sub>2</sub>, 2H), 7.45 (d,  $J$  = 1.6 Hz, Im, 1H), 7.58 (d,  $J$  = 1.8 Hz, Im, 1H); <sup>13</sup>C NMR (50 MHz, CDCl<sub>3</sub>)  $\delta$  14.1, 22.5, 23.9, 26.1, 26.3, 29.8, 31.2, 48.8, 49.7, 118.7, 125.9, 151.9; FAB-HRMS  $m/z$  [M]<sup>+</sup> calcd for C<sub>12</sub>H<sub>21</sub>N<sub>2</sub> 193.1699, found 193.1708.

### Synthesis of 1-methy-2,3-tetramethyleneimidazolium ionic liquids (**4a**)

1-Methyl-2,3-tetramethyleneimidazolium ionic liquids (**4a**) were prepared as described previously.<sup>3</sup> To an ice-cooled solution of 5,6,7,8-tetrahydroimidazo[1,2-*a*]pyridine (50 mg, 0.41 mmol) in acetonitrile was added iodomethane (75 mg, 0.53 mmol). The alkylation reaction was carried out at 0 °C for 1 h. After the reaction, the solvent was removed and the residue was then washed three times with ethyl acetate (2 mL). The residual ethyl acetate was



removed *in vacuo* to afford the desired product **4a**.

**4a**, white solid (decomp. 215 °C); <sup>1</sup>H NMR (200 MHz, DMSO-*d*<sub>6</sub>) δ 1.91-1.94 (bs, 2 × CH<sub>2</sub>, 4H), 2.96 (bs, N=CCH<sub>2</sub>, 2H), 3.69 (s, CH<sub>3</sub>, 3H), 4.07-4.09 (m, NCH<sub>2</sub>, 2H), 7.60 (dd, *J* = 2.0, 6.0 Hz, Im, 2H); <sup>13</sup>C NMR (50 MHz, DMSO-*d*<sub>6</sub>) δ 17.6, 20.1, 20.7, 33.6, 45.7, 120.5, 121.9, 144.2; FAB-HRMS *m/z* [M]<sup>+</sup> calcd for C<sub>8</sub>H<sub>13</sub>N<sub>2</sub> 137.1079, found 137.1076.

### Synthesis of 1-alkyl-2,3-tetramethyleneimidazolium ionic liquids (**4b-f**)

1-Alkyl-2,3-tetramethyleneimidazolium ionic liquids (**4b-f**) were prepared as described previously.<sup>3</sup> To a round-bottomed flask containing 5,6,7,8-tetrahydroimidazo[1,2-*a*]pyridine (50 mg, 0.41 mmol) was added alkyl halide (0.53 mmol). The alkylation reaction was allowed to proceed at 60 °C for 2 h. After the reaction, the solution was washed three times with ethyl acetate (3 x 2 mL). The residual ethyl acetate was removed *in vacuo* to afford the desired products **4b-f**.

**4b**, colorless liquid; <sup>1</sup>H NMR (200 MHz, CDCl<sub>3</sub>) δ 1.51 (t, *J* = 7.4 Hz, CH<sub>3</sub>, 3H), 2.06-2.15 (m, 2 × CH<sub>2</sub>, 4H), 3.17 (bs, N=CCH<sub>2</sub>, 2H), 4.20-4.31 (m, 2 × NCH<sub>2</sub>, 4H), 7.57 (t, *J* = 1.4 Hz, Im, 2H); <sup>13</sup>C NMR (50 MHz, CDCl<sub>3</sub>) δ 15.2, 18.5, 21.4, 21.5, 120.1, 121.8, 143.4; FAB-HRMS *m/z* [M]<sup>+</sup> calcd for C<sub>9</sub>H<sub>15</sub>N<sub>2</sub> 151.1235, found 151.1235.

**4c**, colorless liquid; <sup>1</sup>H NMR (200 MHz, CDCl<sub>3</sub>) δ 0.98 (t, *J* = 7.4 Hz, CH<sub>3</sub>, 3H), 1.91 (sx, *J* = 7.2 Hz, CH<sub>2</sub>, 2H), 2.12-2.15 (m, 2 × CH<sub>2</sub>, 4H), 3.17 (bs, N=CCH<sub>2</sub>, 2H), 4.13 (t, *J* = 7.4 Hz, NCH<sub>2</sub>, 2H), 4.31 (bs, NCH<sub>2</sub>, 2H), 7.51 (d, *J* = 1.8 Hz, Im, 1H), 7.61 (d,

$J = 1.8$  Hz, Im, 1H);  $^{13}\text{C}$  NMR (50 MHz,  $\text{CDCl}_3$ )  $\delta$  10.8, 18.1, 21.1, 21.2, 22.8, 46.7, 49.1, 121.1, 121.4, 143.2; FAB-HRMS  $m/z$   $[\text{M}]^+$  calcd for  $\text{C}_{10}\text{H}_{17}\text{N}_2$  165.1392, found 165.1391.

**4d**, white solid (mp 134-137 °C);  $^1\text{H}$  NMR (200 MHz,  $\text{CDCl}_3$ )  $\delta$  0.93 (t,  $J = 7.2$  Hz,  $\text{CH}_3$ , 3H), 1.36 (sx,  $J = 7.4$  Hz,  $\text{CH}_2$ , 2H), 1.79 (qn,  $J = 7.2$  Hz,  $\text{CH}_2$ , 2H), 1.98-2.13 (m,  $2 \times \text{CH}_2$ , 4H), 3.13 (bs,  $\text{N}=\text{CCH}_2$ , 2H), 4.16 (t,  $J = 7.4$  Hz,  $\text{NCH}_2$ , 2H), 4.31 (bs,  $\text{NCH}_2$ , 2H), 7.50 (d,  $J = 2.2$  Hz, Im, 1H), 7.65 (d,  $J = 2.2$  Hz, Im, 1H);  $^{13}\text{C}$  NMR (50 MHz,  $\text{CDCl}_3$ )  $\delta$  13.3, 18.1, 19.4, 21.1, 21.2, 31.3, 46.7, 47.5, 121.1, 121.5, 143.2; FAB-HRMS  $m/z$   $[\text{M}]^+$  calcd for  $\text{C}_{11}\text{H}_{19}\text{N}_2$  179.1548, found 179.1546.

**4e**, yellow liquid;  $^1\text{H}$  NMR (200 MHz,  $\text{CDCl}_3$ )  $\delta$  0.89 (t,  $J = 6.8$  Hz,  $\text{CH}_3$ , 3H), 1.33 (sx,  $J = 3.6$  Hz,  $2 \times \text{CH}_2$ , 4H), 1.82 (qn,  $J = 7.4$  Hz,  $\text{CH}_2$ , 2H), 2.12-2.15 (m,  $2 \times \text{CH}_2$ , 4H), 3.11 (bs,  $\text{N}=\text{CCH}_2$ , 2H), 4.14 (t,  $J = 7.4$  Hz,  $\text{NCH}_2$ , 2H), 4.31 (bs  $\text{NCH}_2$ , 2H), 7.44 (d,  $J = 2.0$  Hz, Im, 1H), 7.59 (d,  $J = 2.0$  Hz, Im, 1H);  $^{13}\text{C}$  NMR (50 MHz,  $\text{CDCl}_3$ )  $\delta$  13.7, 18.2, 21.2, 21.3, 22.0, 28.3, 29.1, 46.8, 47.8, 121.1, 121.6, 143.3; FAB-HRMS  $m/z$   $[\text{M}]^+$  calcd  $\text{C}_{12}\text{H}_{21}\text{N}_2$  for 193.1705, found 193.1702.

**4f**, yellow liquid;  $^1\text{H}$  NMR (200 MHz,  $\text{CDCl}_3$ )  $\delta$  0.86 (t,  $J = 6.2$  Hz,  $\text{CH}_3$ , 3H), 1.30 (bs,  $3 \times \text{CH}_2$ , 6H), 1.77-1.81 (m,  $J = 7.4$  Hz,  $\text{CH}_2$ , 2H), 2.14 (bs,  $2 \times \text{CH}_2$ , 4H), 3.11 (bs,  $\text{N}=\text{CCH}_2$ , 2H), 4.14 (t,  $J = 7.4$  Hz,  $\text{NCH}_2$ , 2H), 4.32 (bs,  $\text{NCH}_2$ , 2H), 7.44 (bs, Im, 1H), 7.62 (bs, Im, 1H);  $^{13}\text{C}$  NMR (50 MHz,  $\text{CDCl}_3$ )  $\delta$  13.5, 17.9, 20.9, 20.7, 22.0, 25.6, 29.1, 30.7, 46.5, 47.5, 120.9, 121.3, 143.0; FAB-HRMS  $m/z$   $[\text{M}]^+$  calcd for  $\text{C}_{11}\text{H}_{19}\text{N}_2$  179.1548, found 179.1546.

## References

1. I. Dinares, C. Garcia De Miguel, A. Ibanez, N. Mesquida and E. Alcalde, *Green Chemistry*, 2009, **11**, 1507 – 1510.
2. J.-C. Hsu, Y.-H. Yen and Y.-H. Chu, *Tetrahedron*, 2004, **45**, 4673-4676.
3. H.-C. Kan, M.-C. Tseng and Y.-H. Chu, *Tetrahedron*, 2007, **63**, 1644-1653.

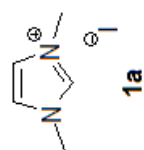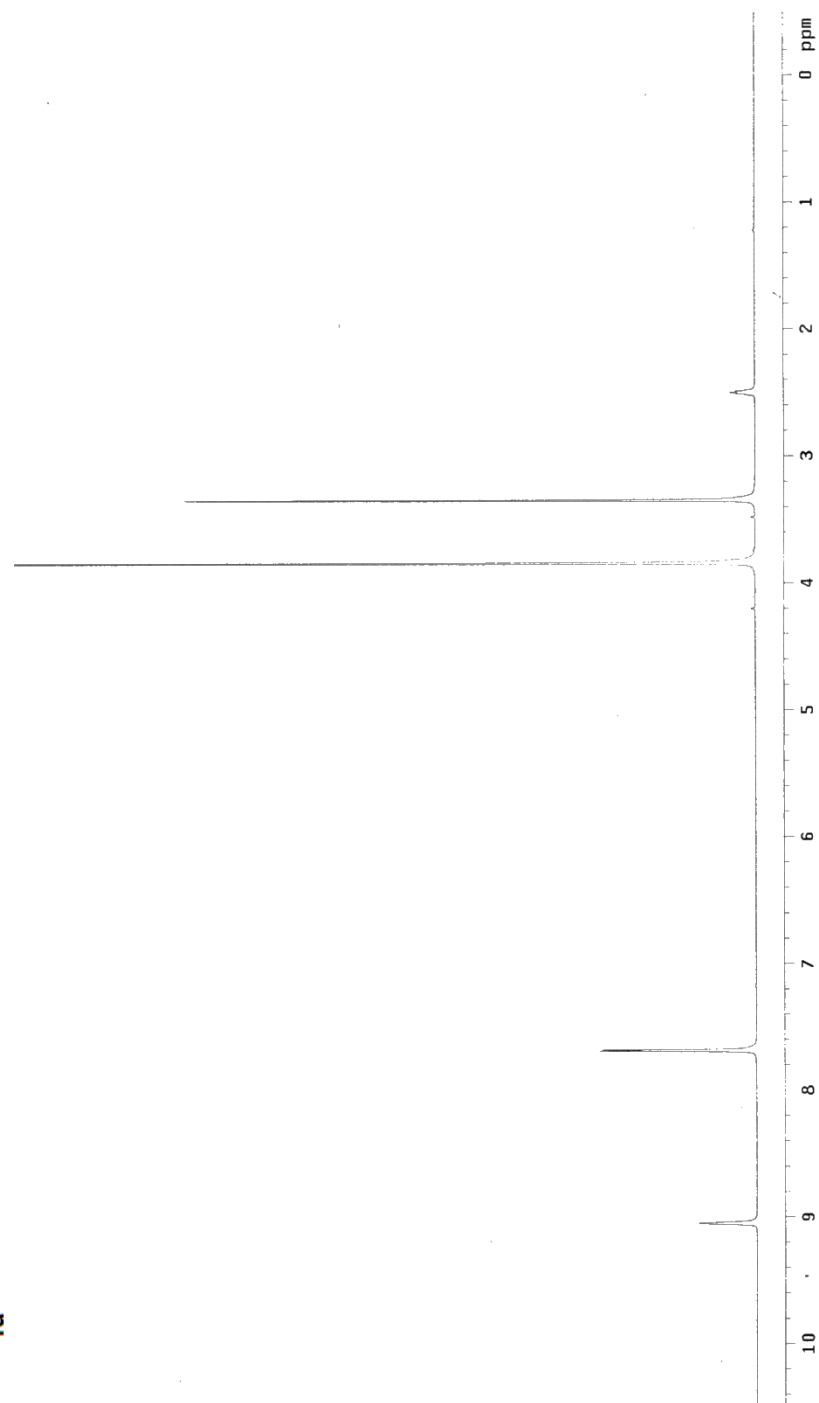

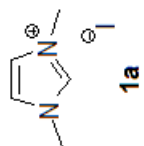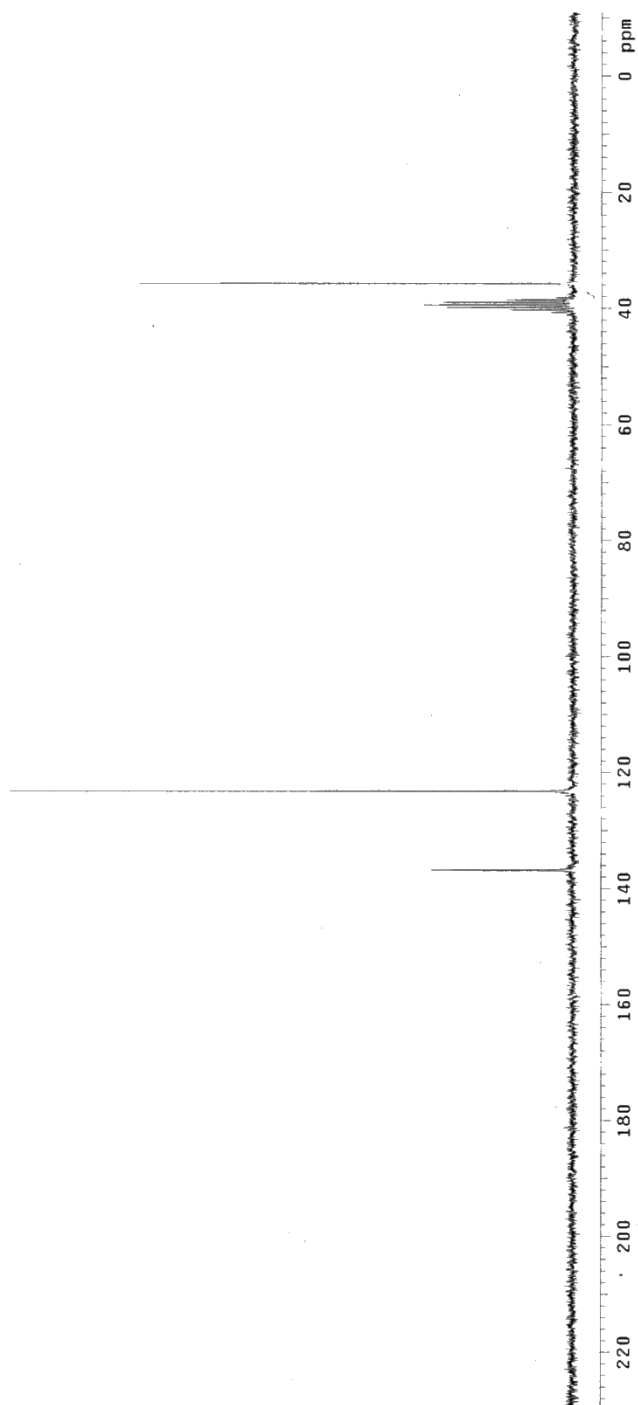

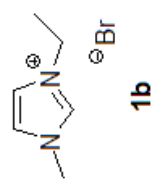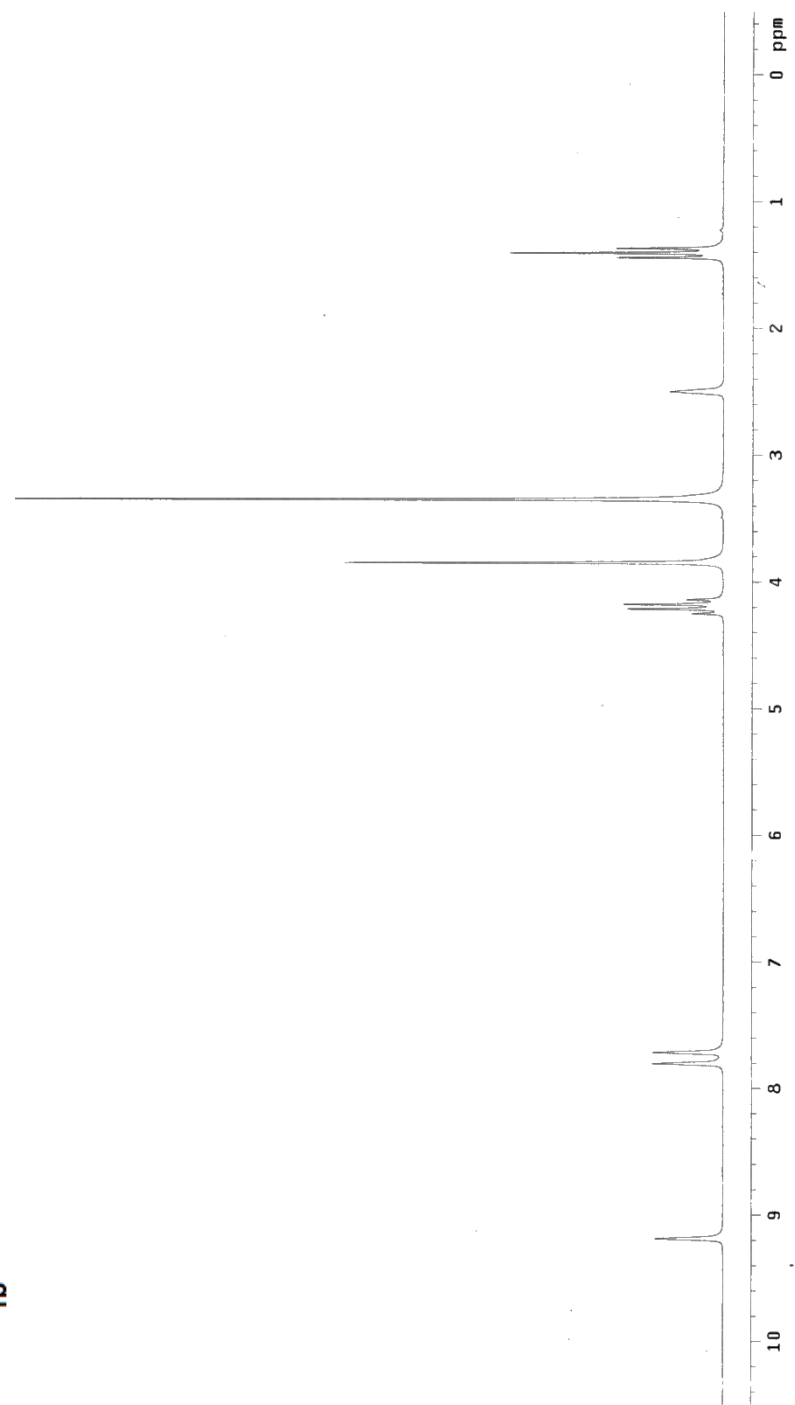

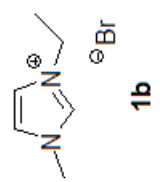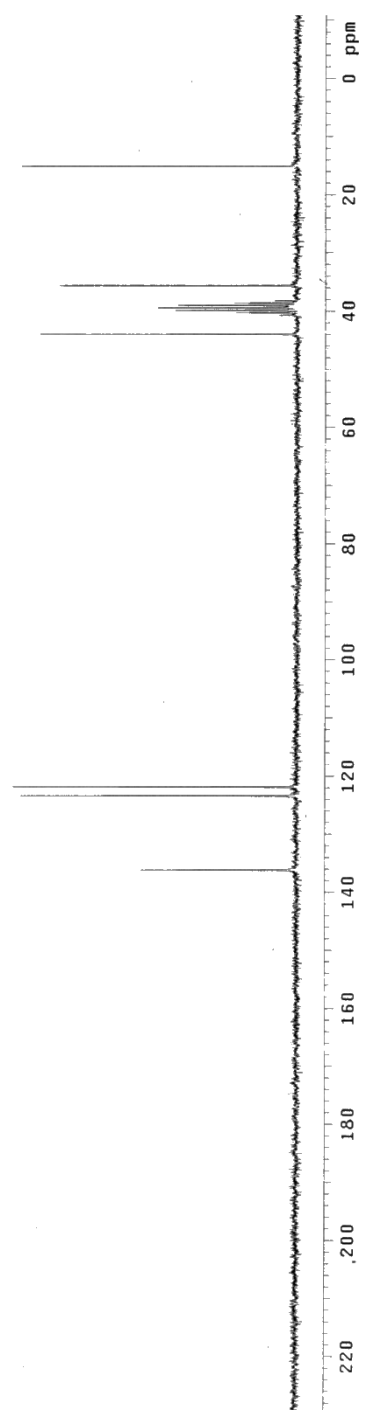

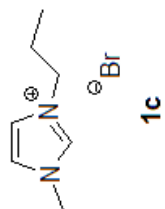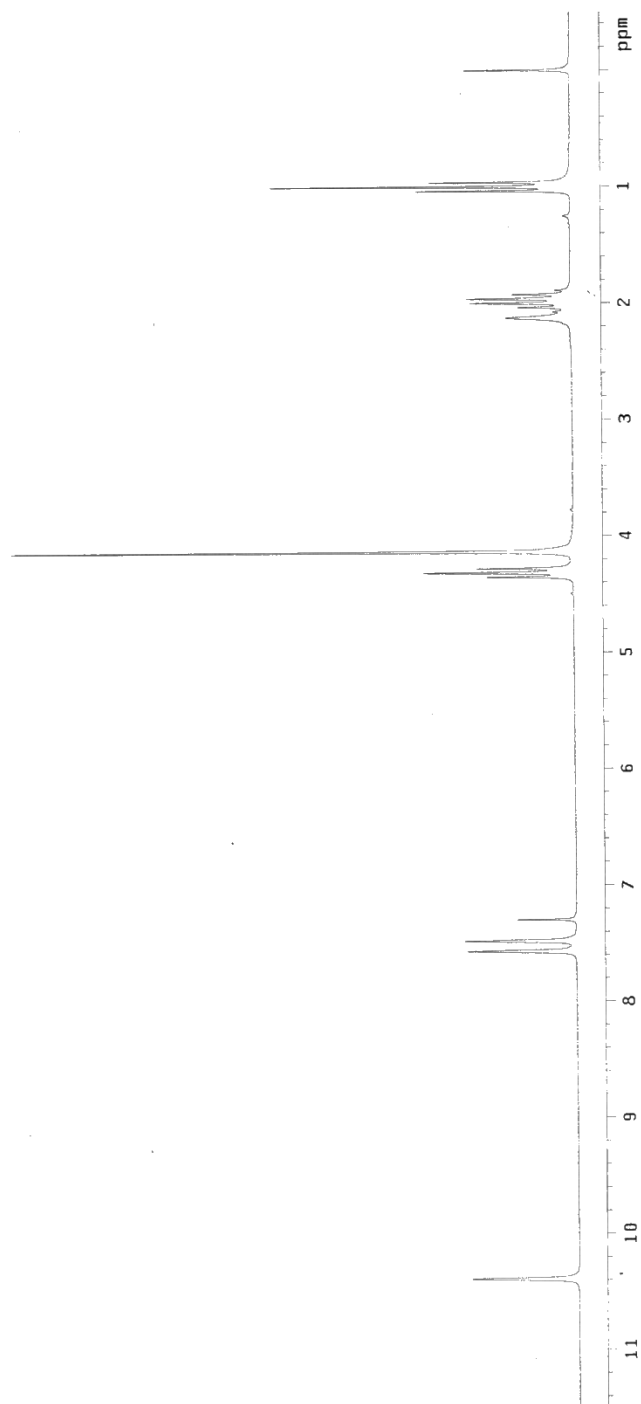



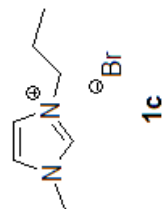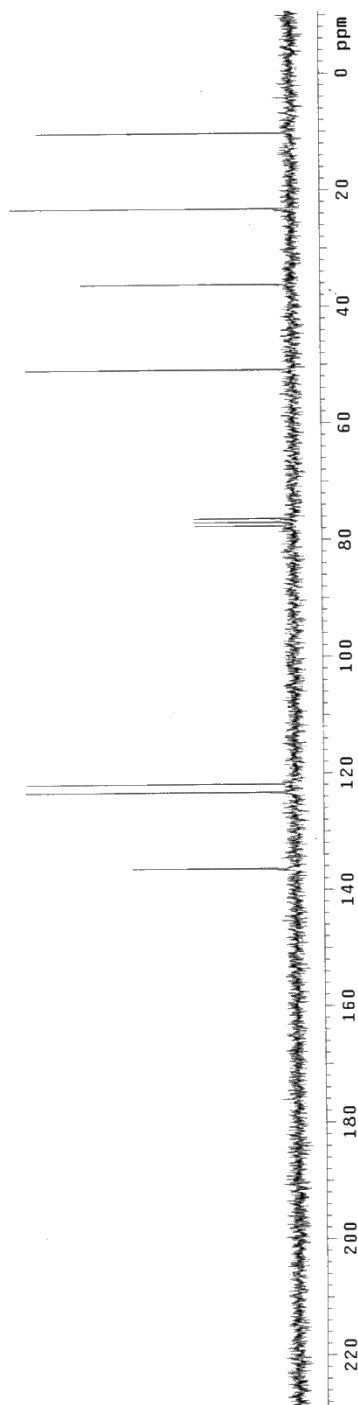

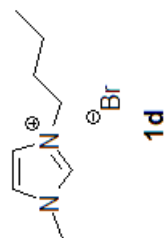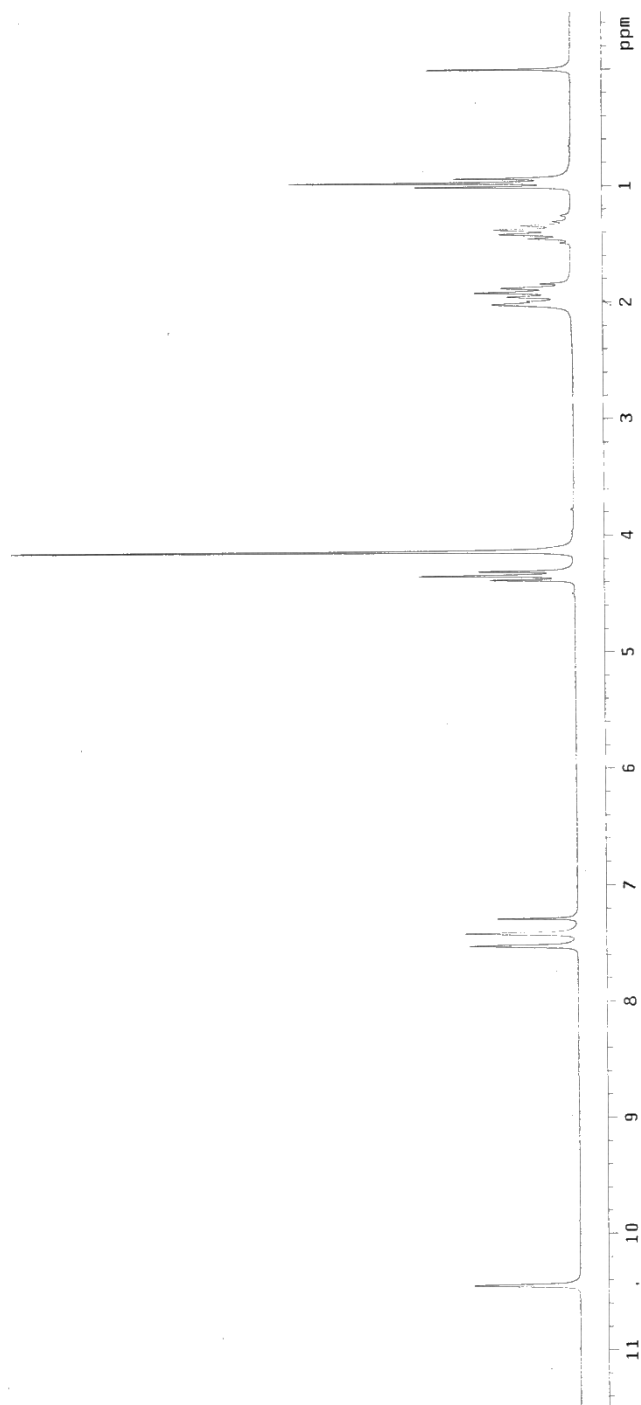

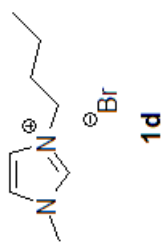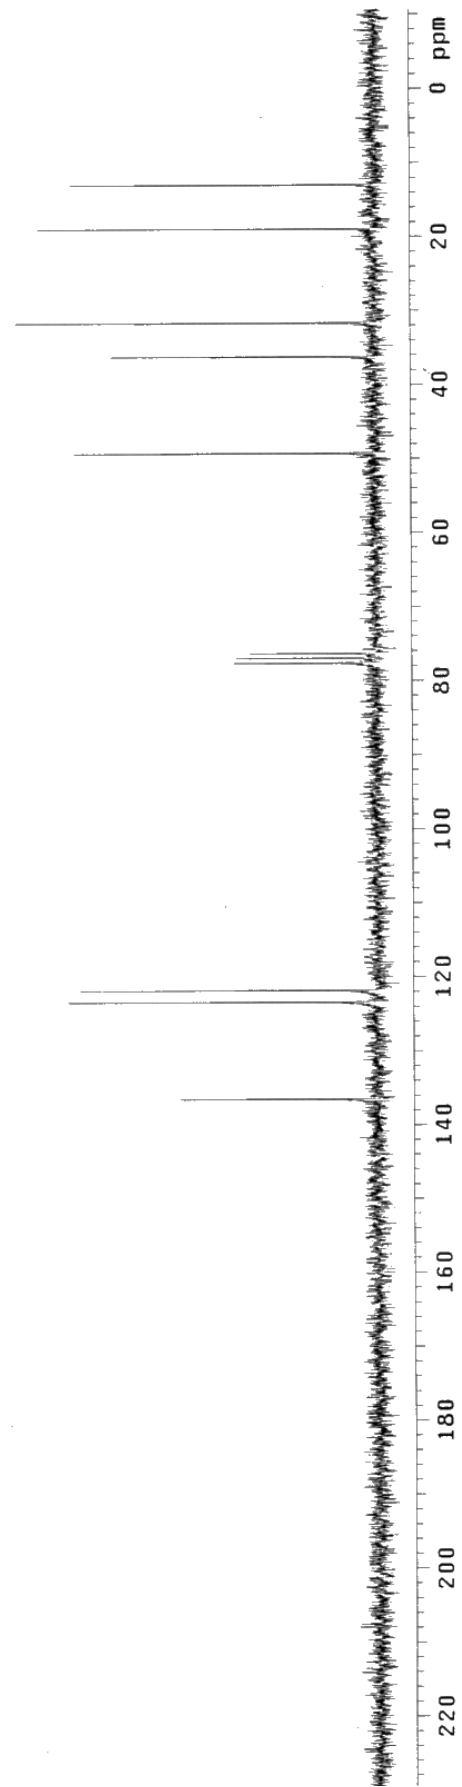

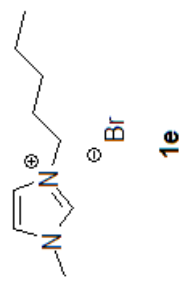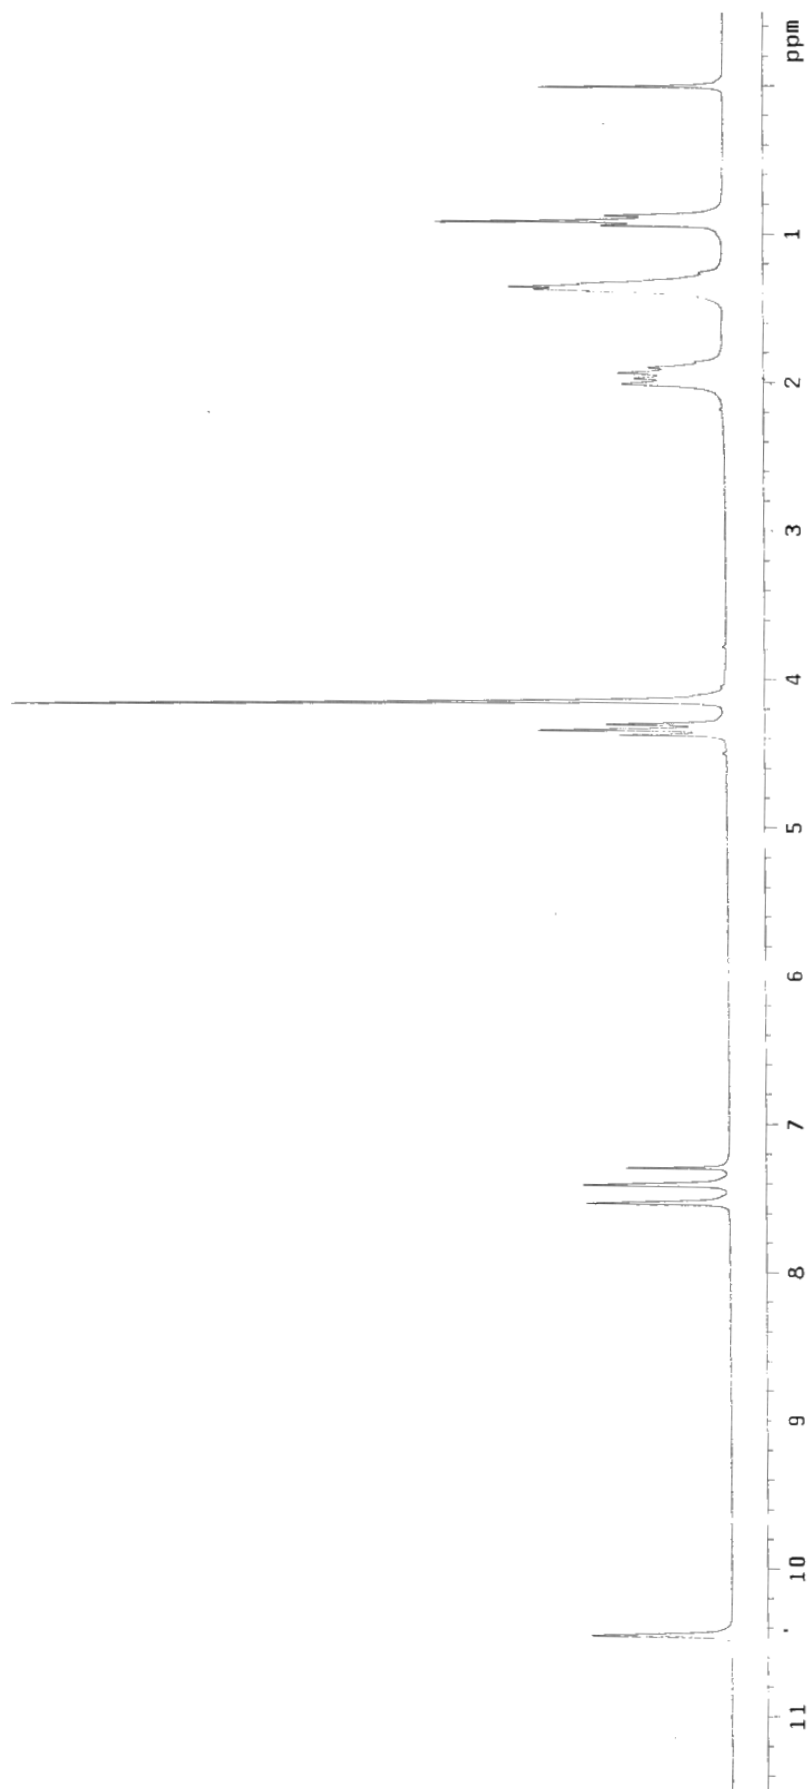

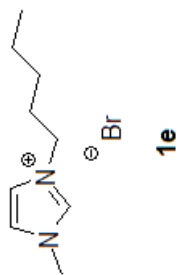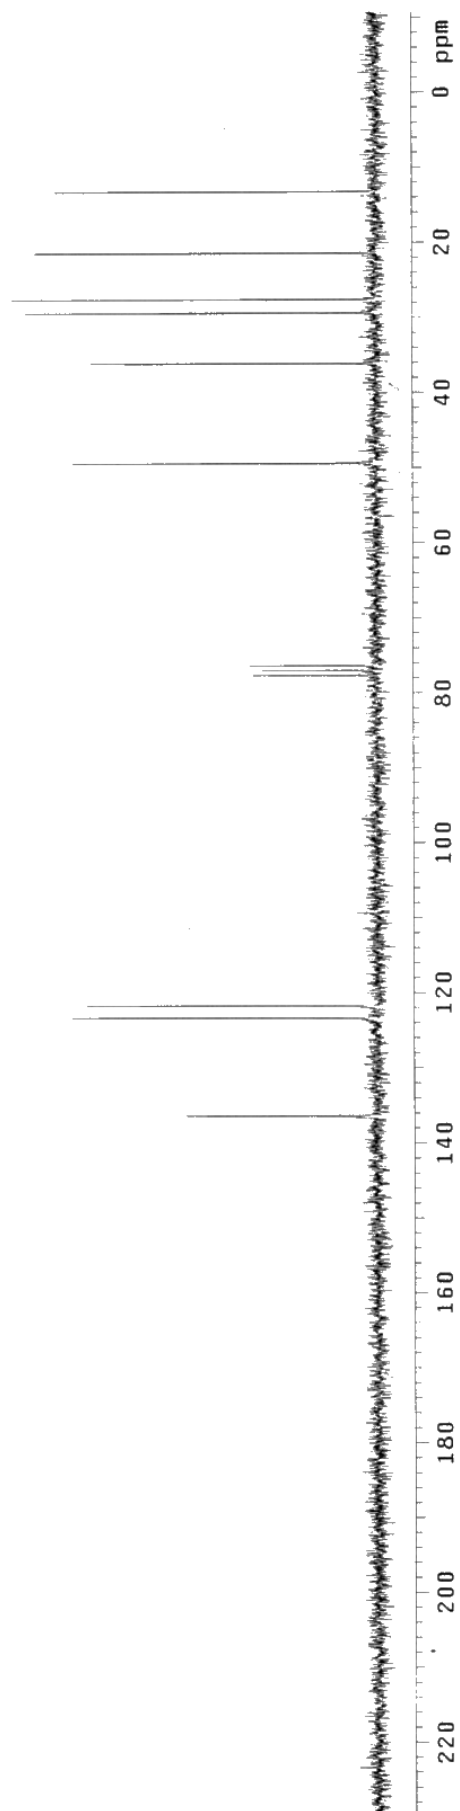

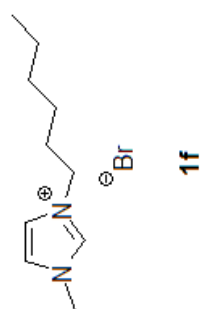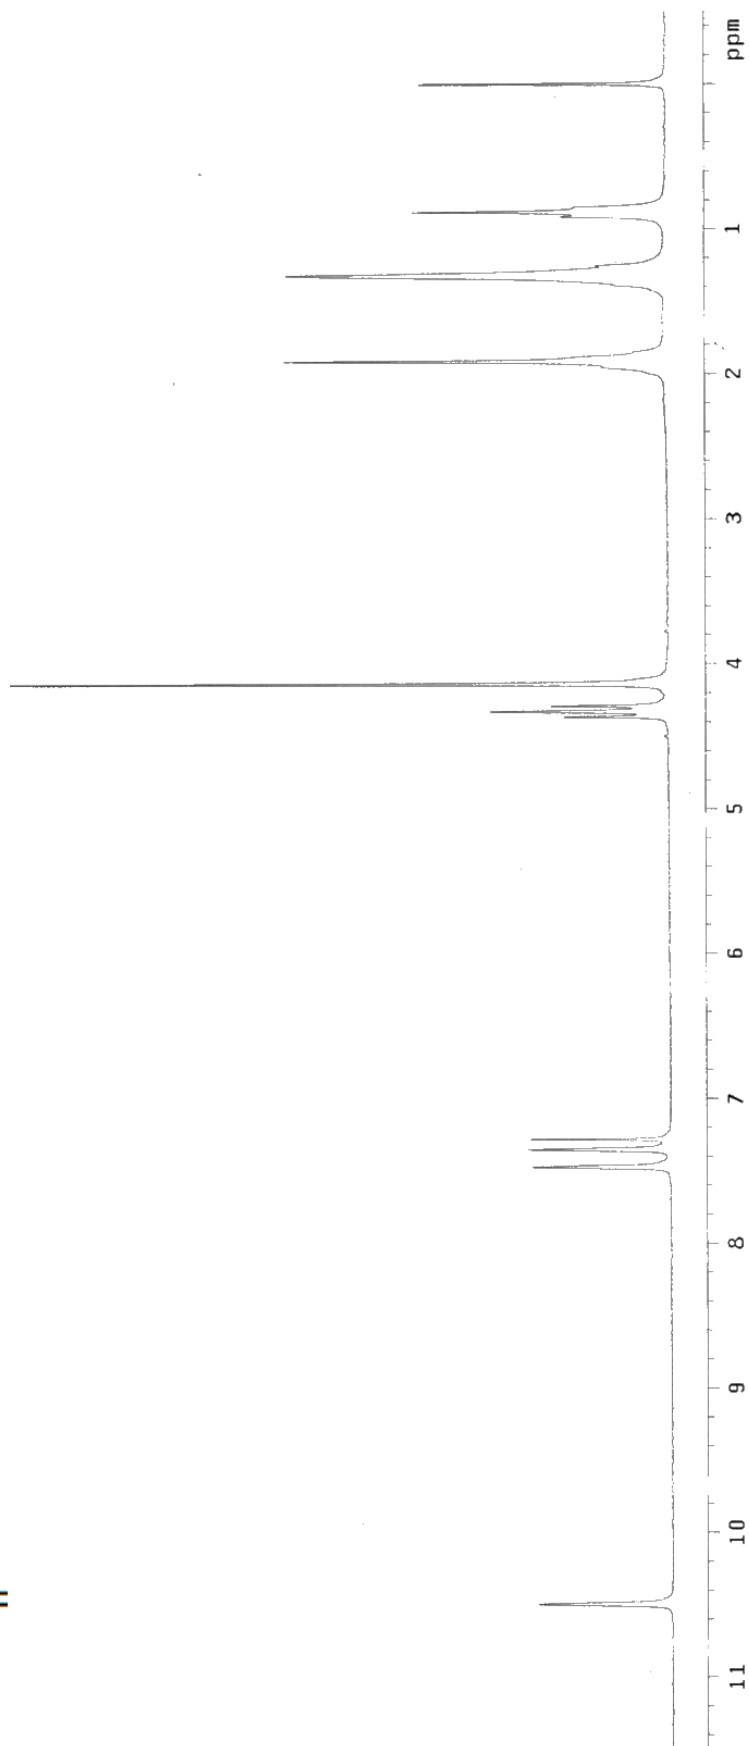

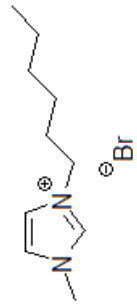

**1f**

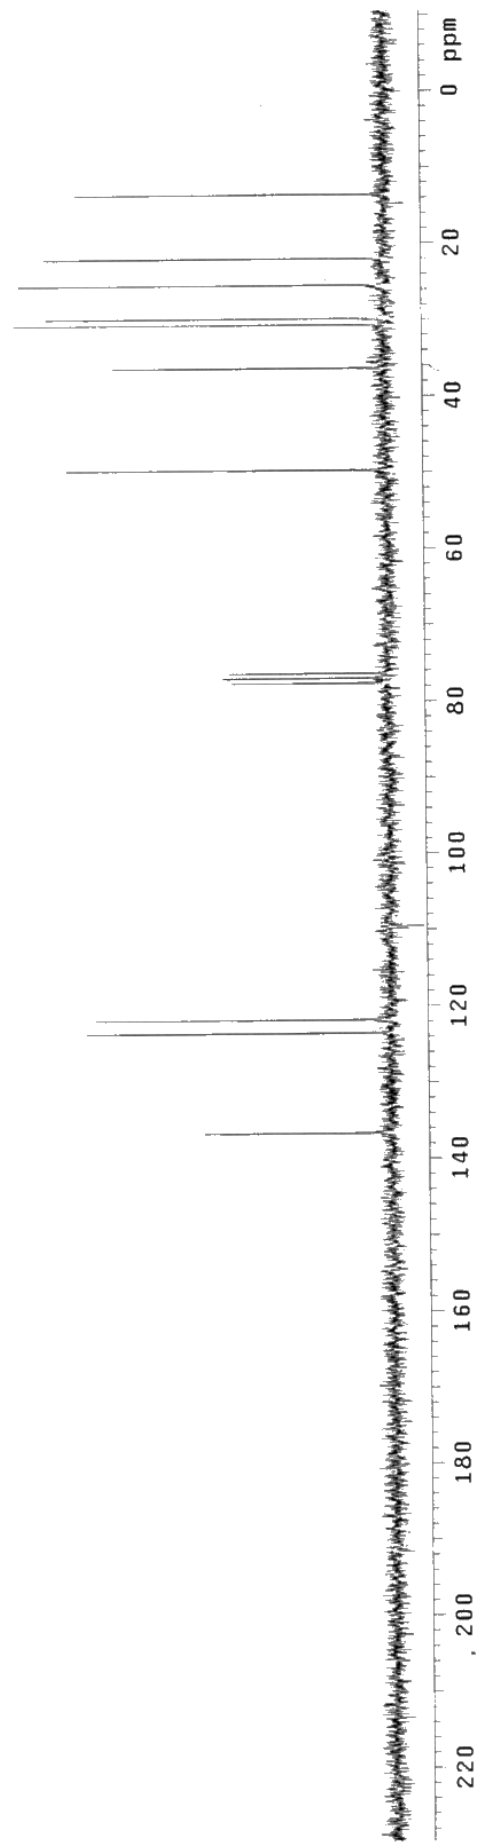

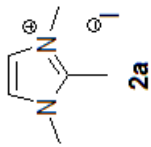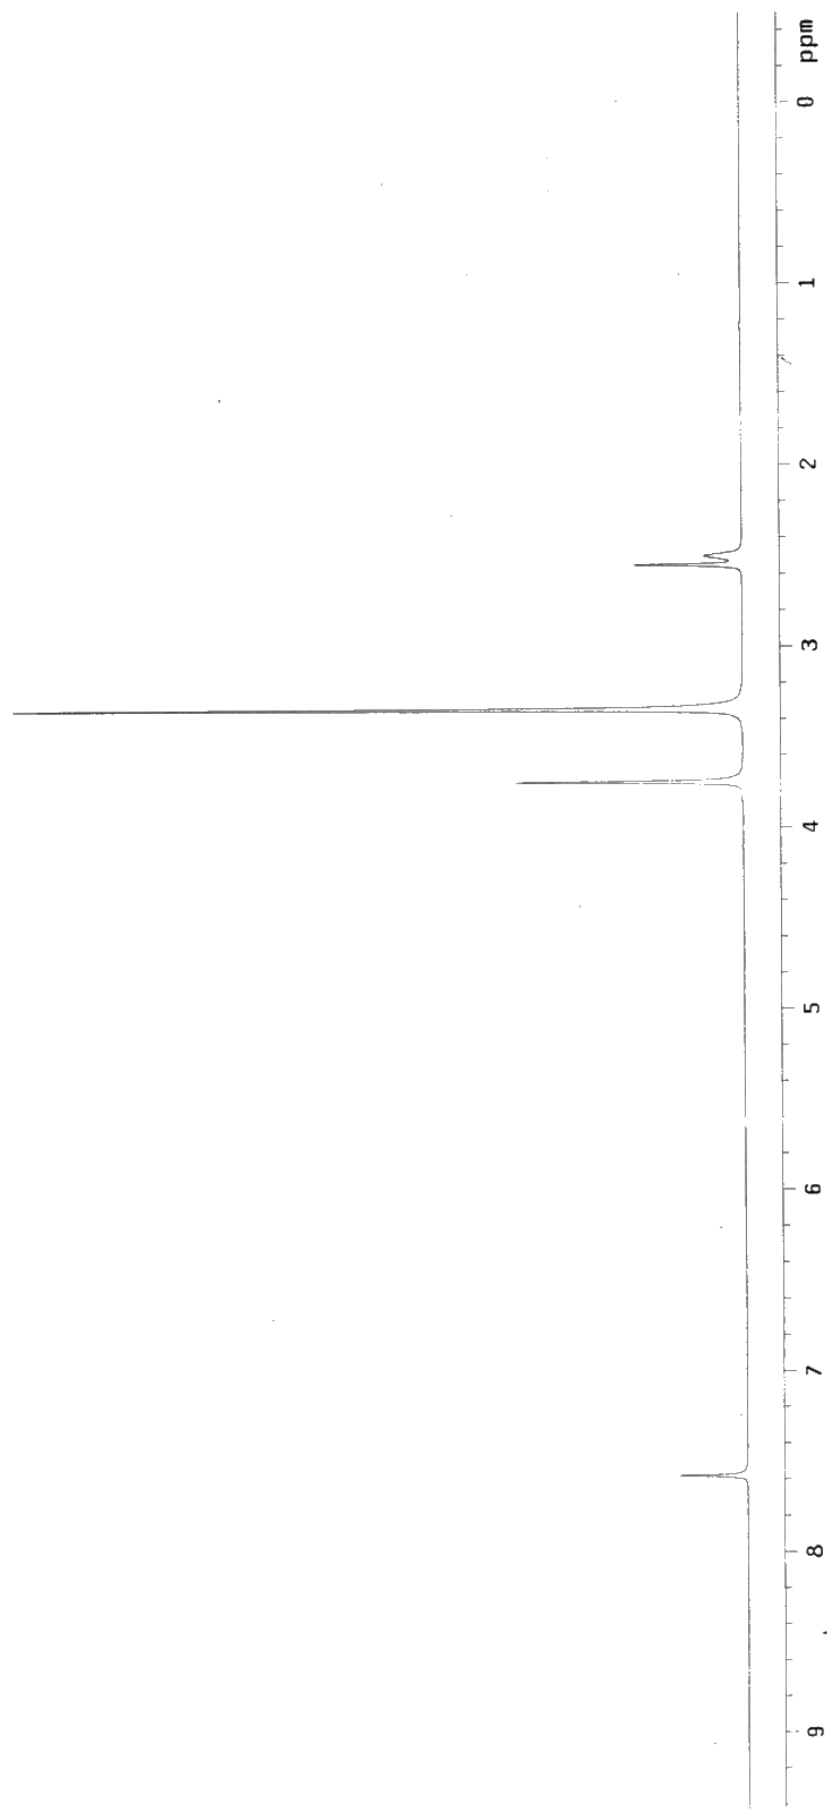



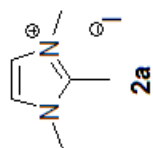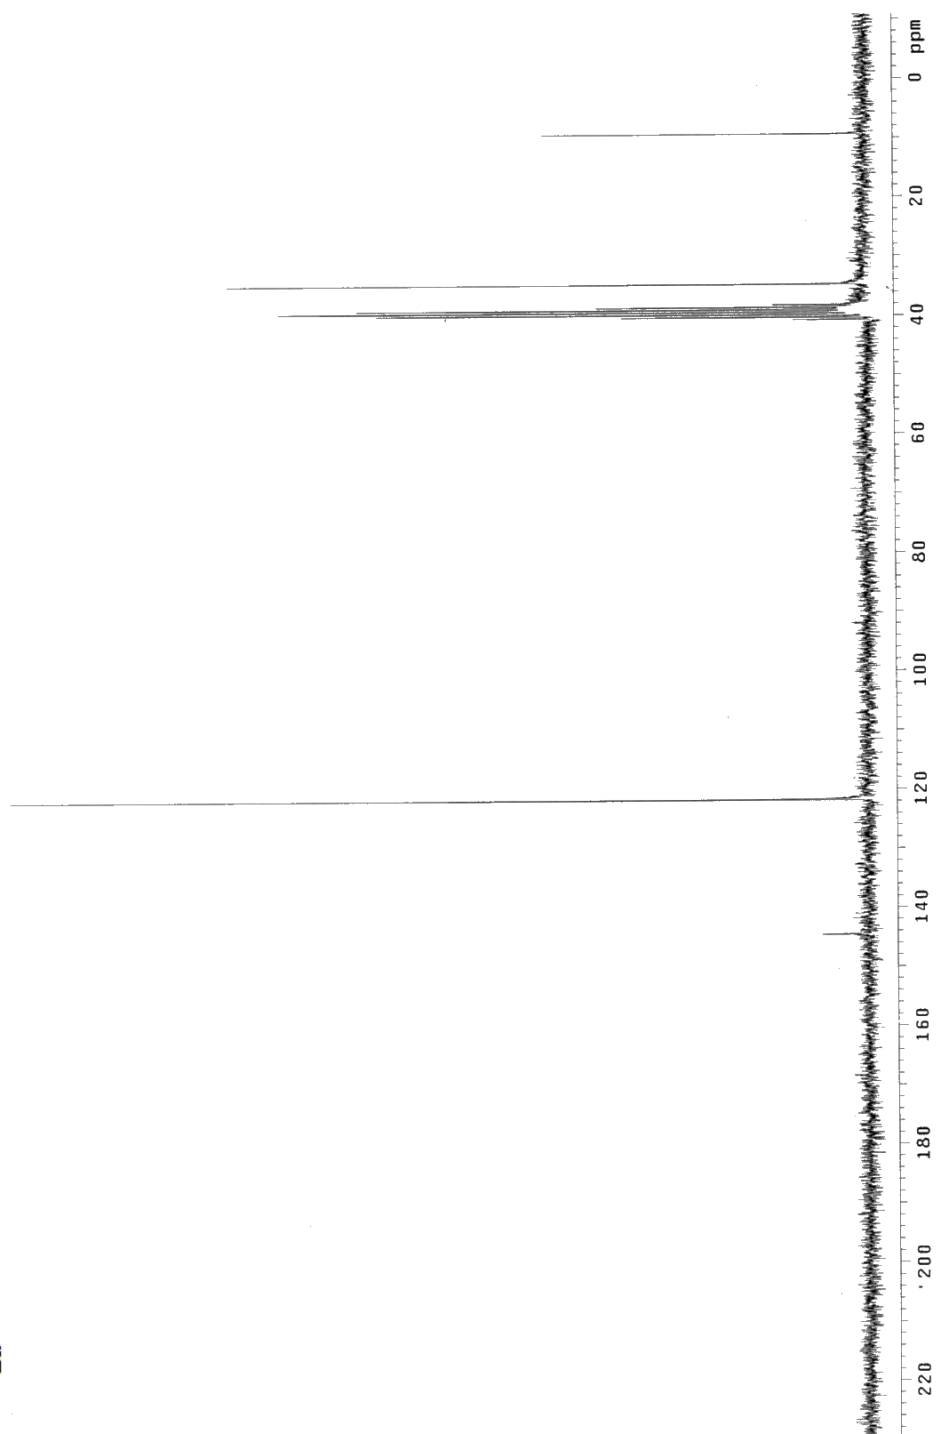

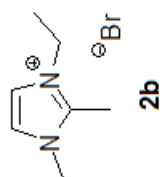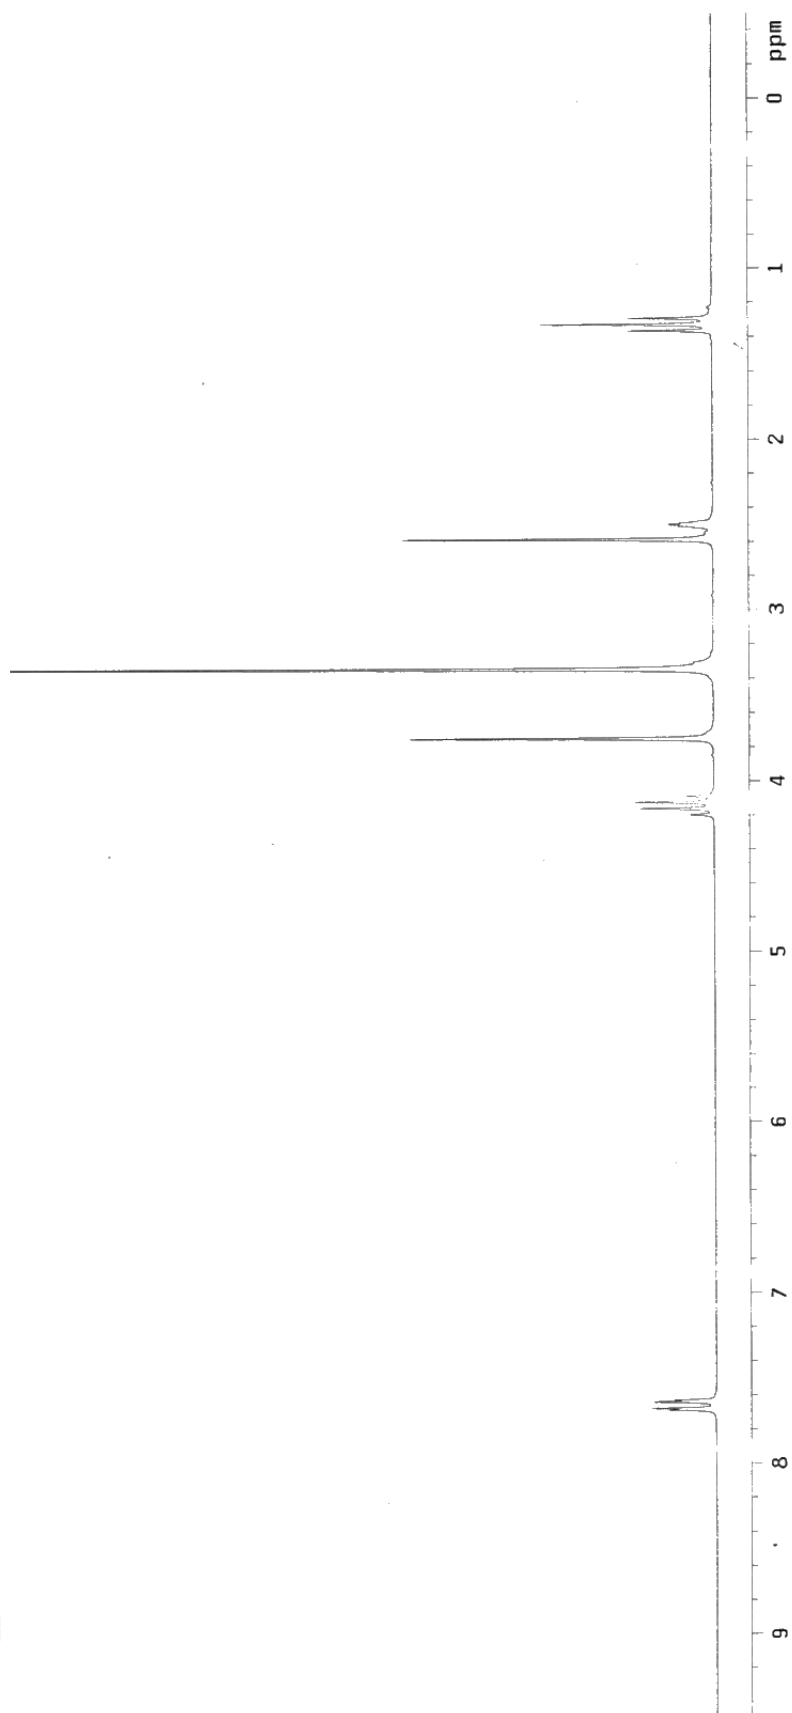

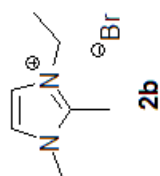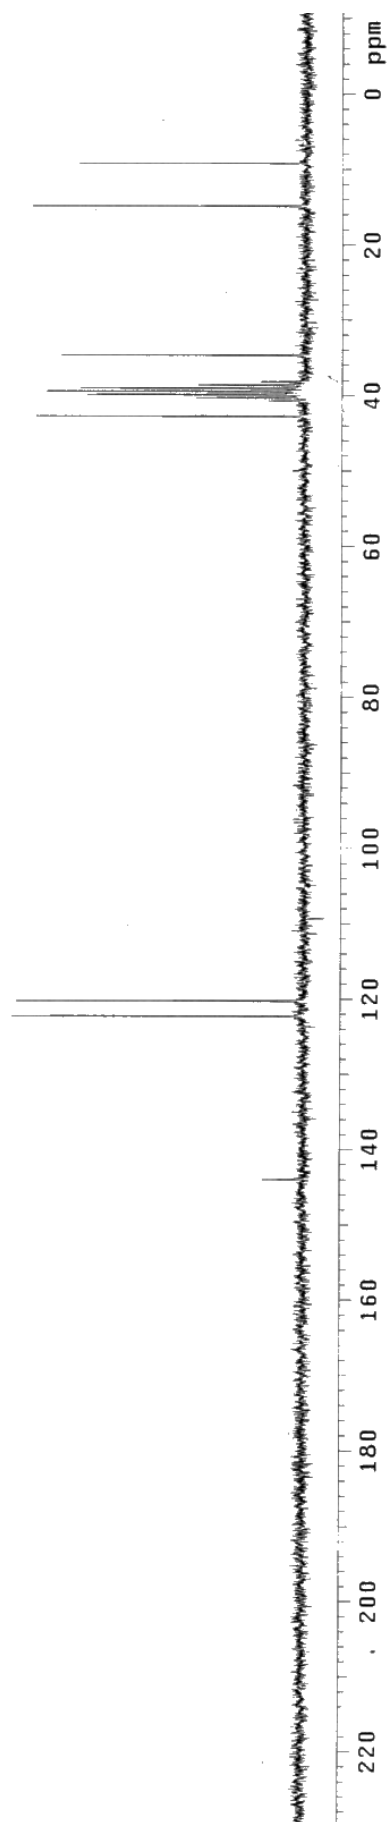

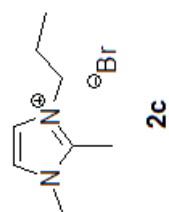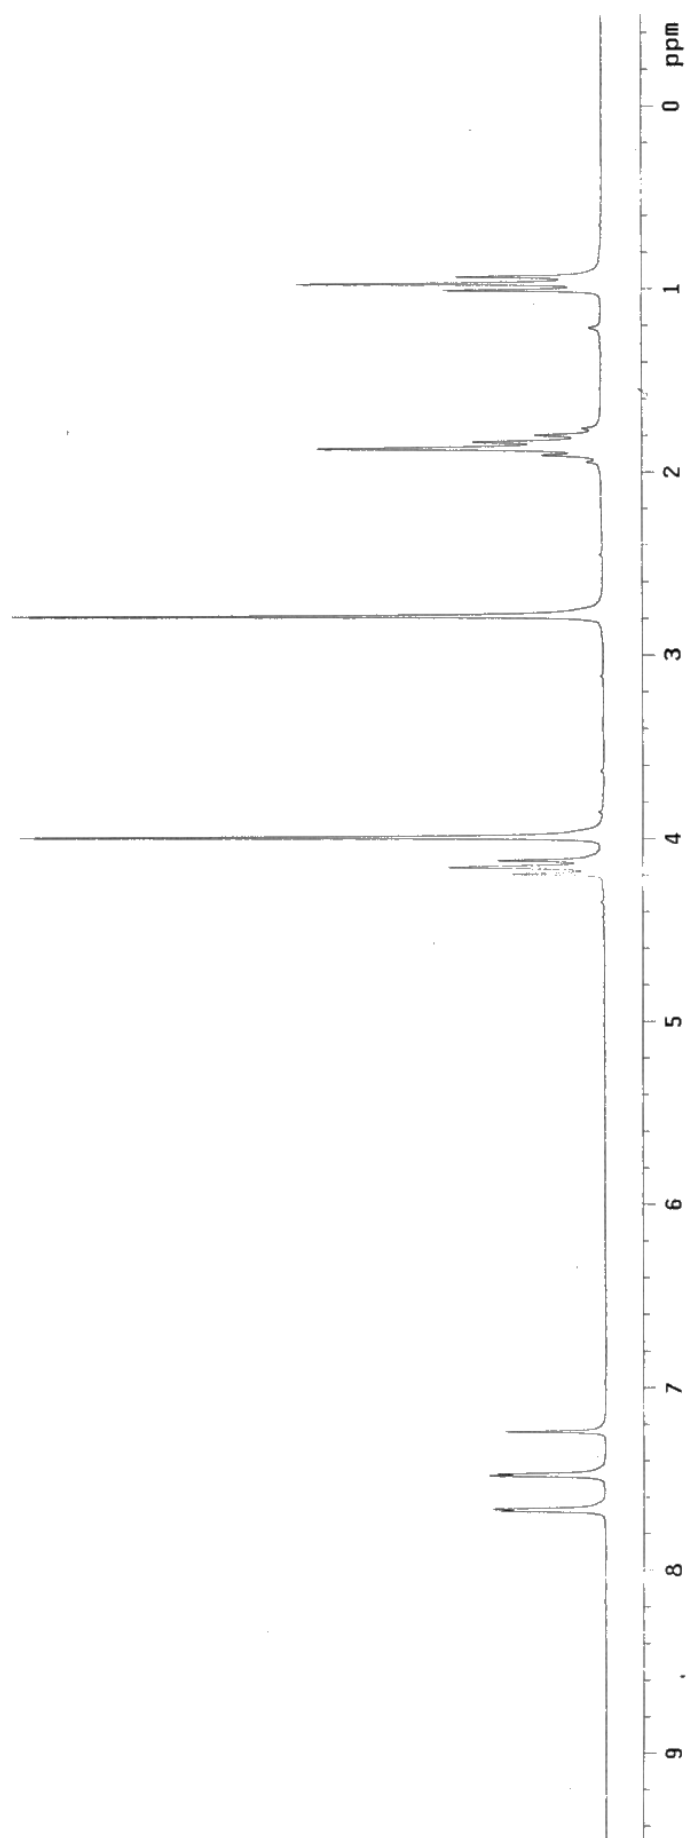

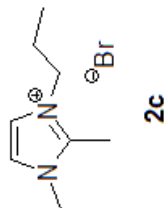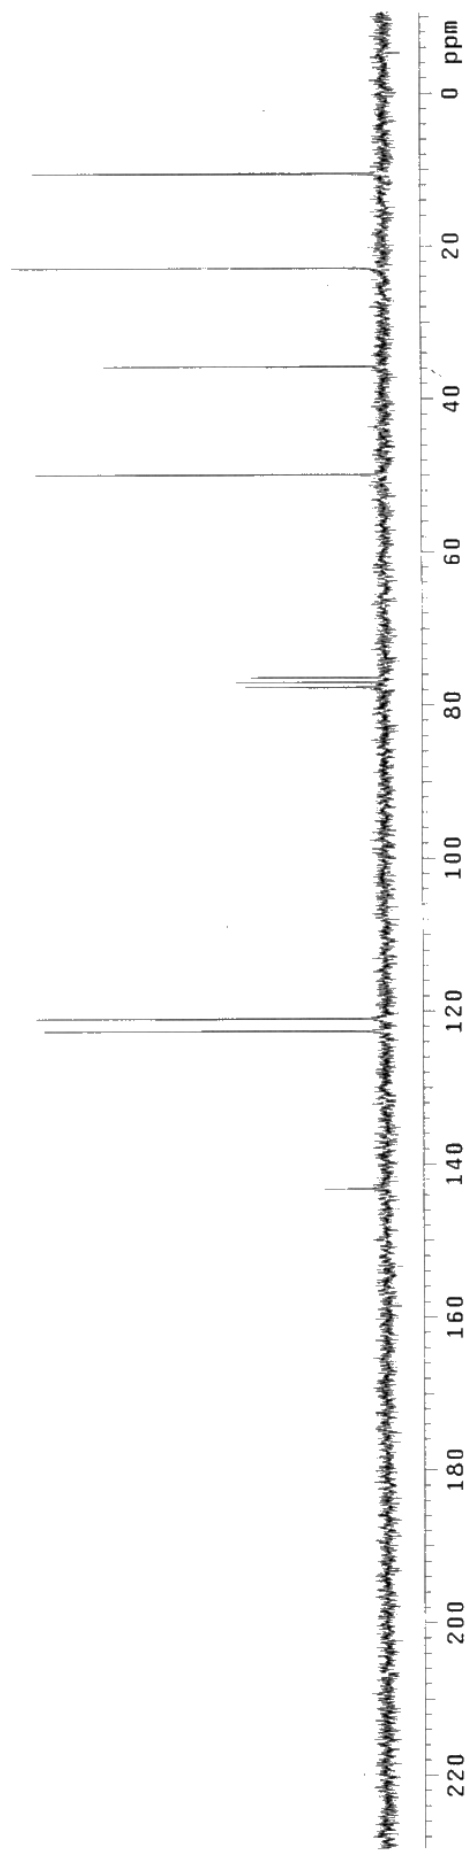

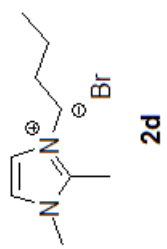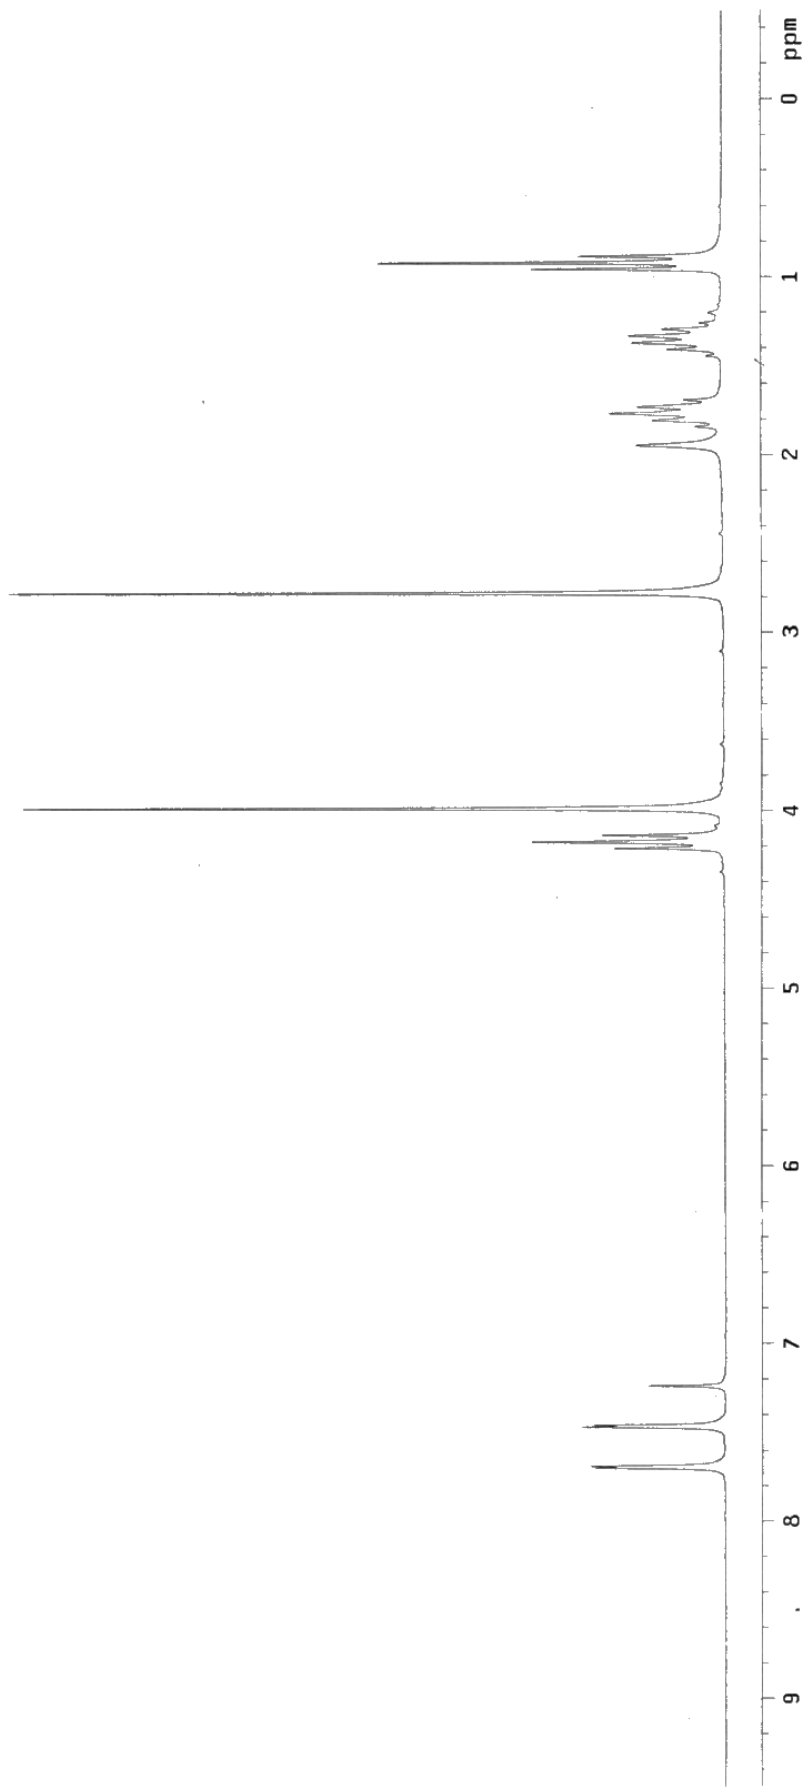

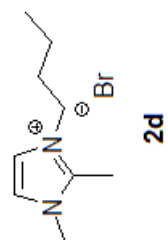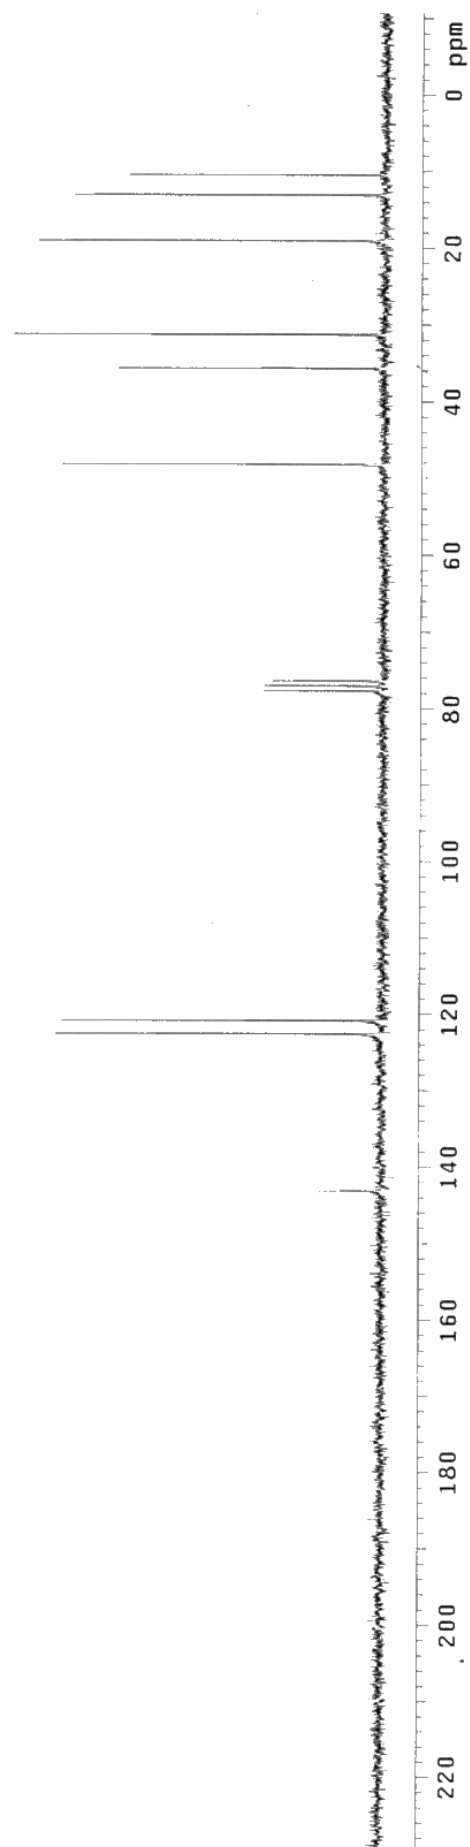

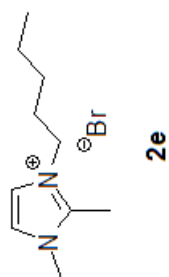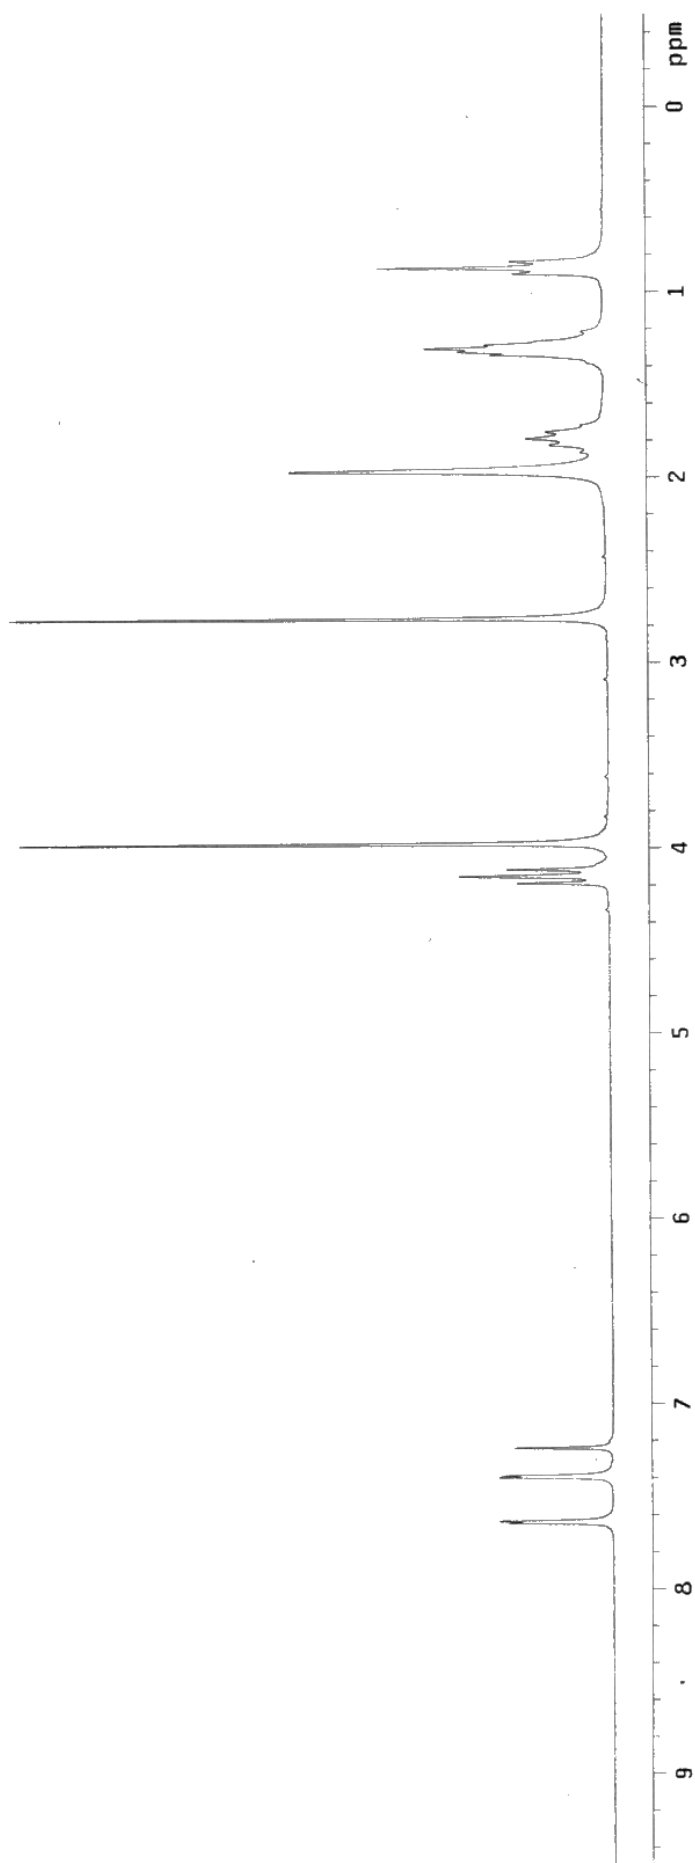



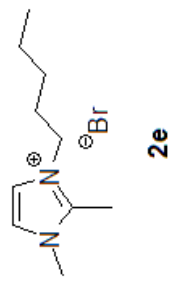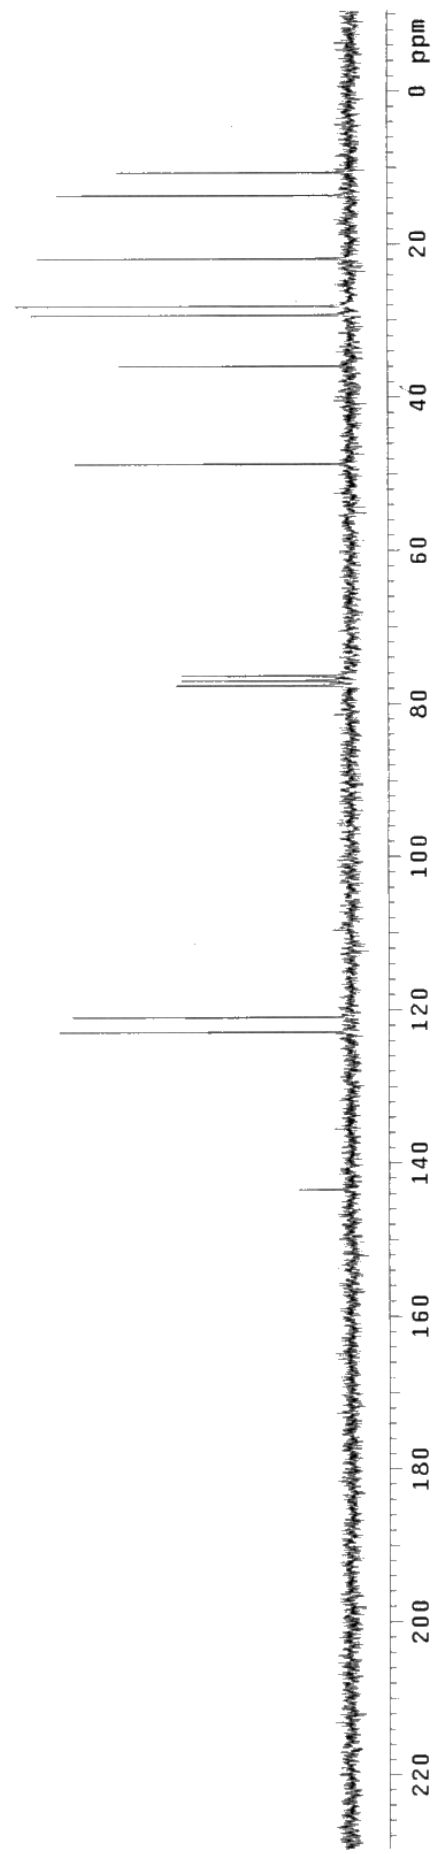

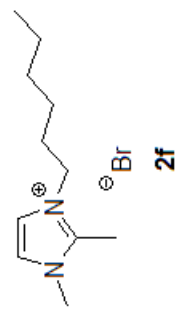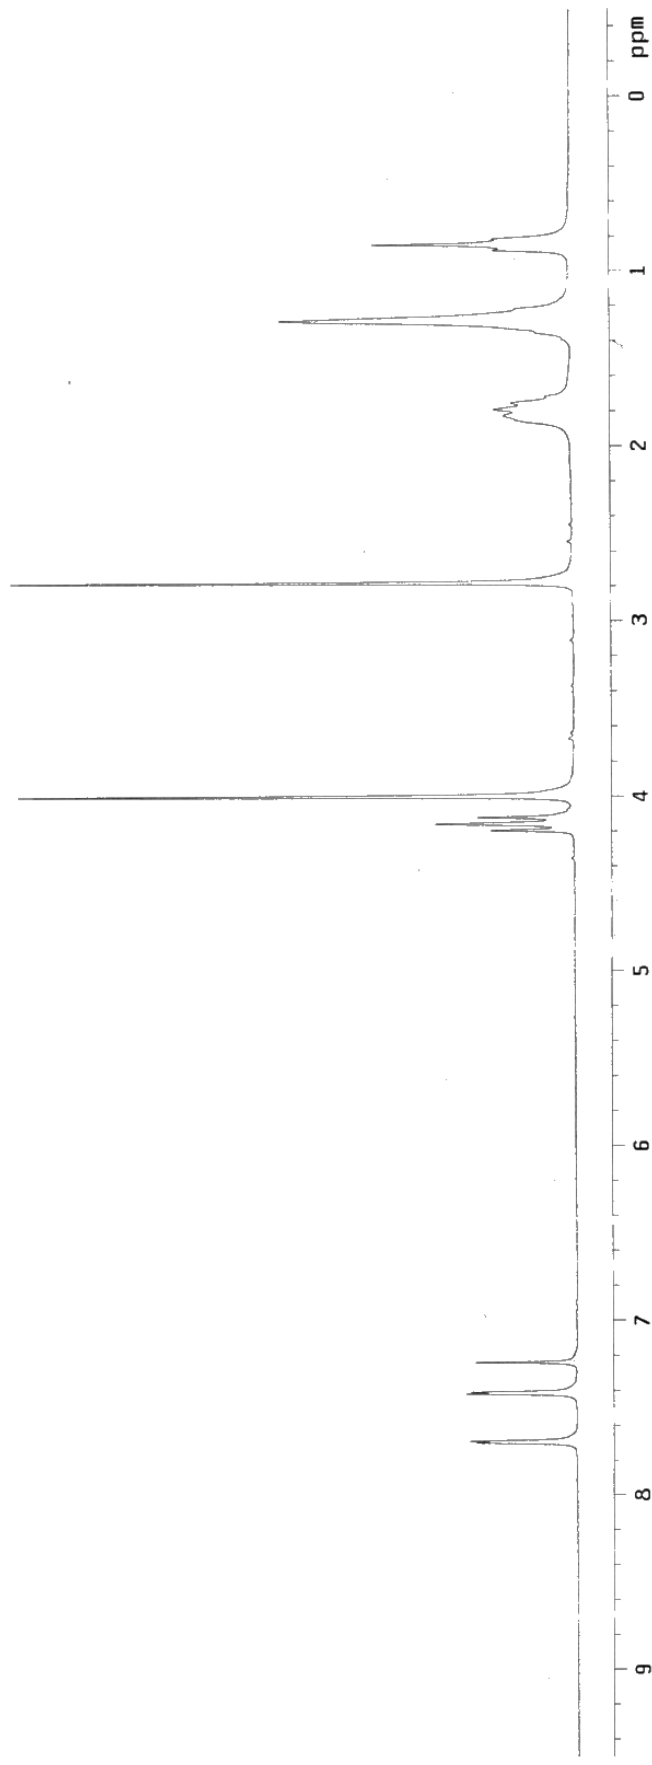

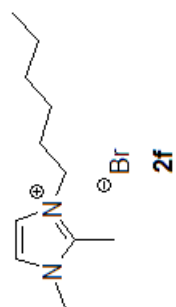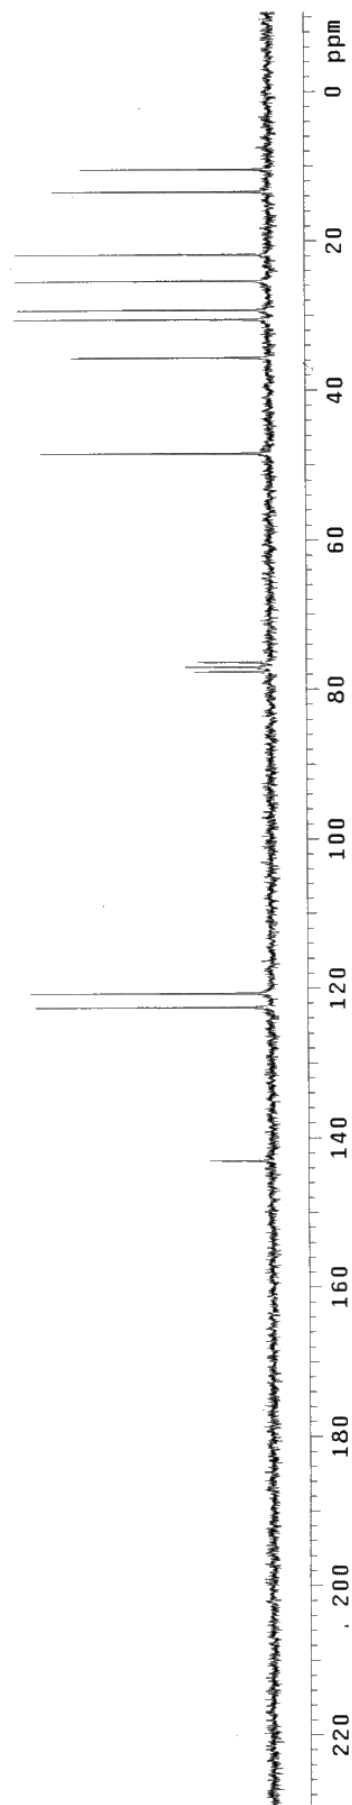

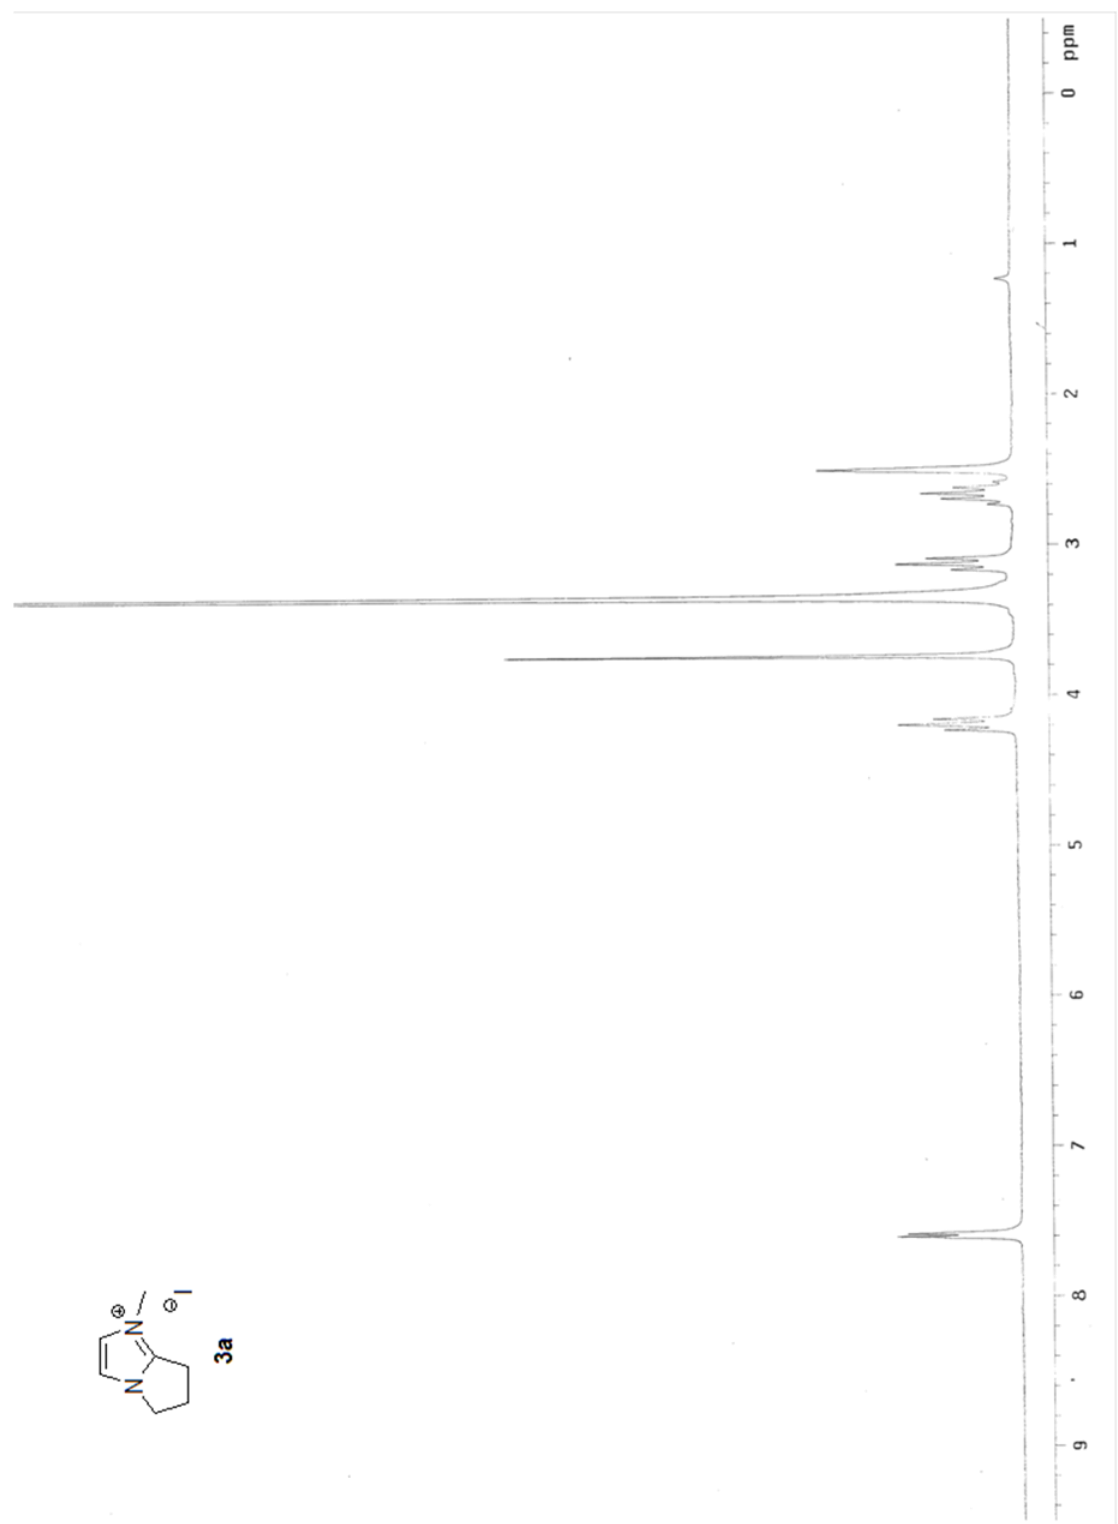

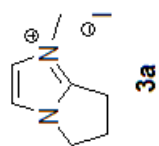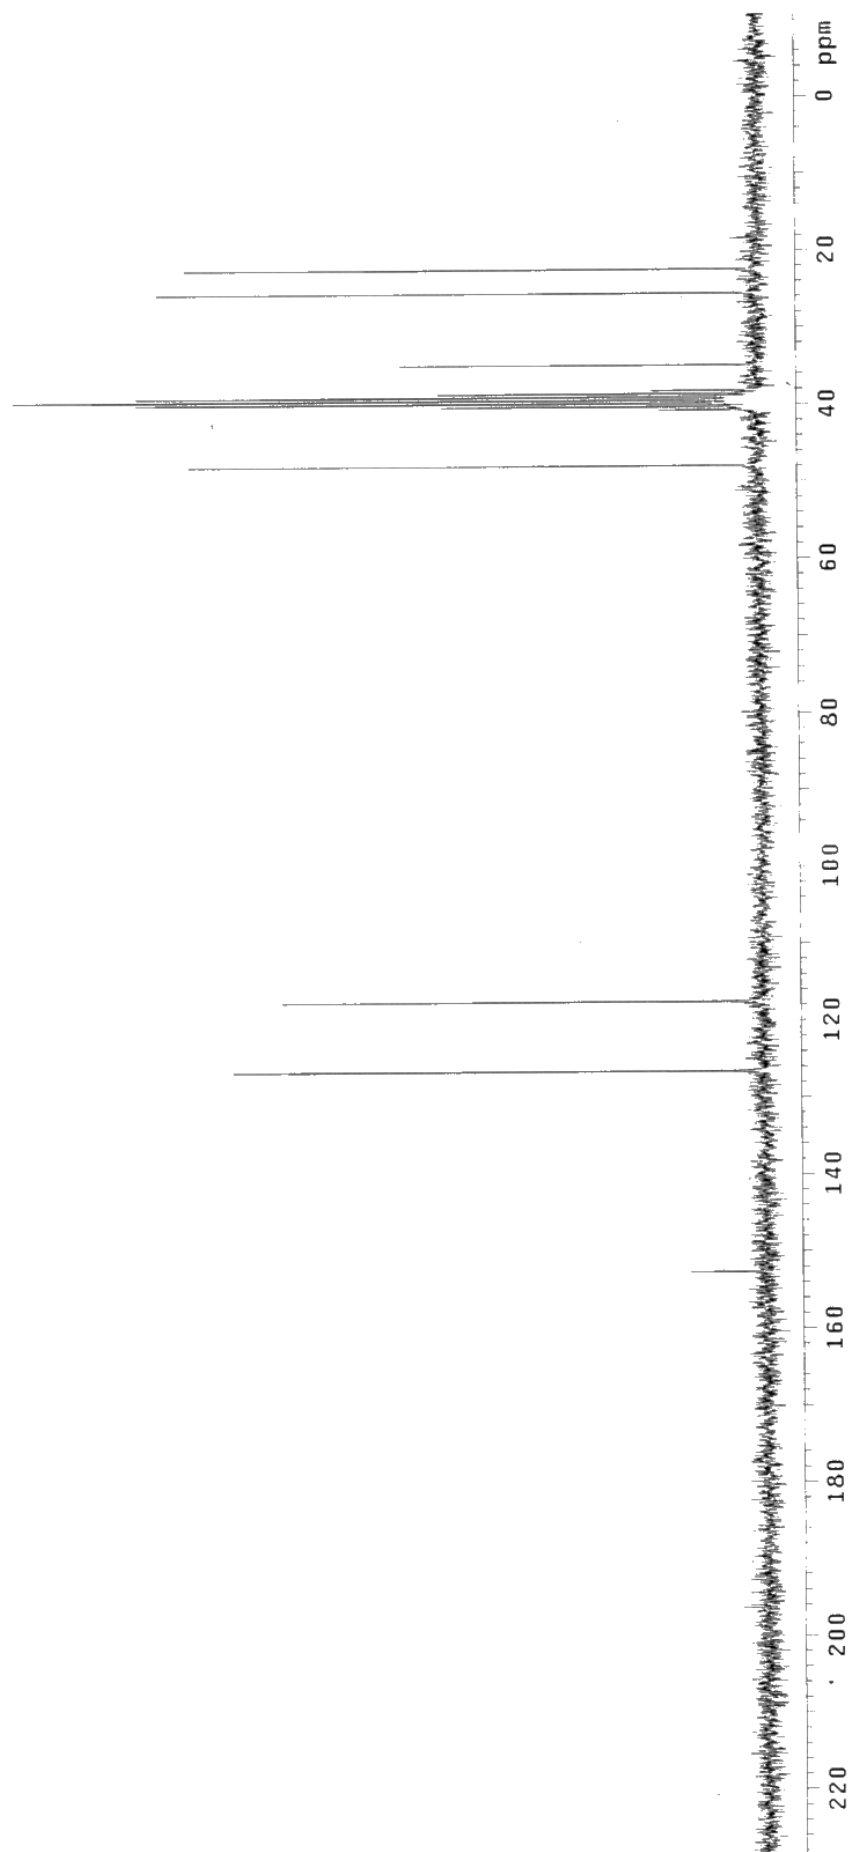

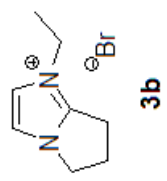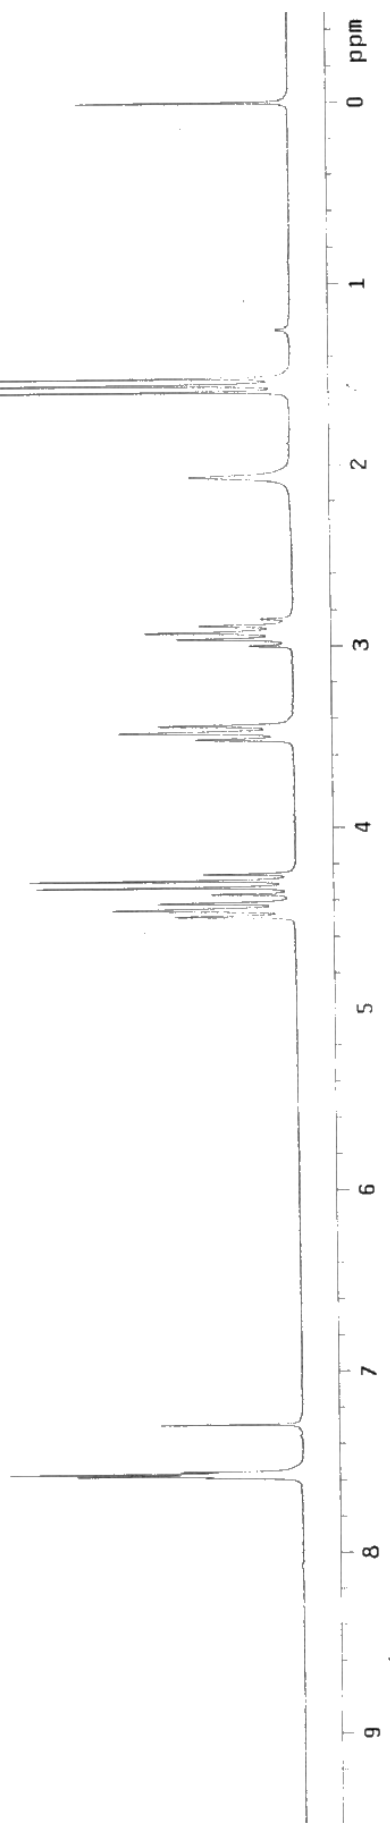

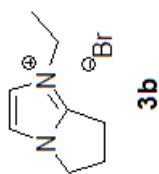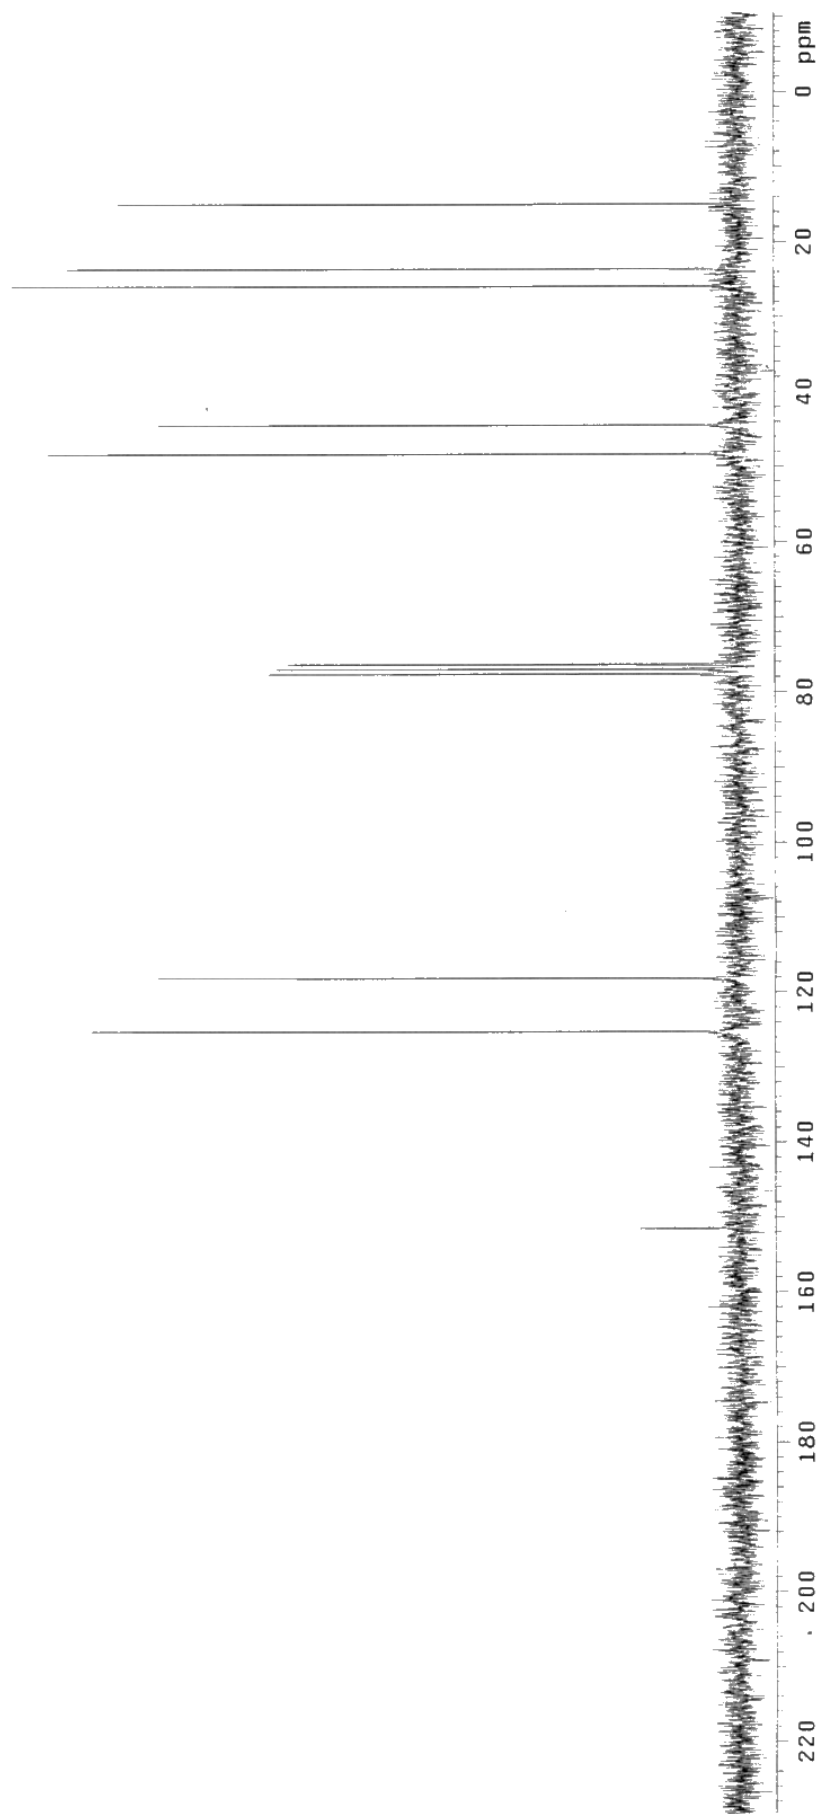

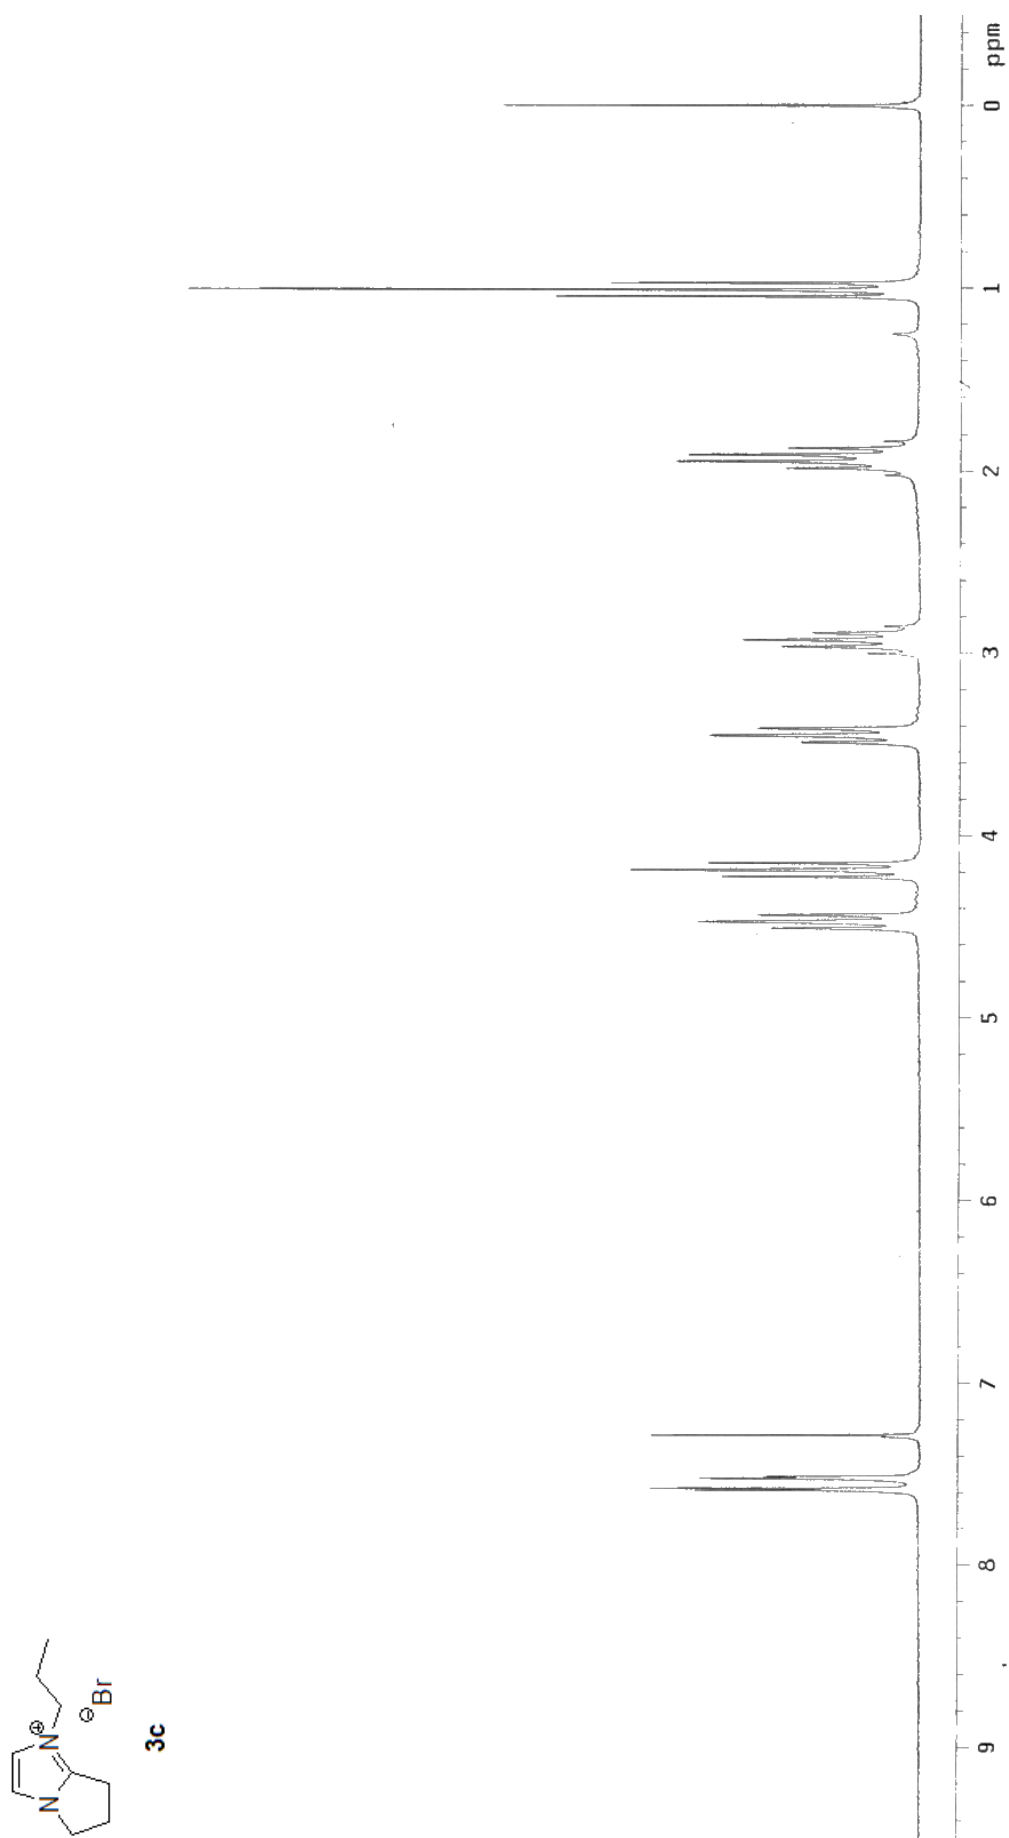



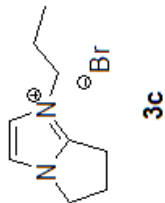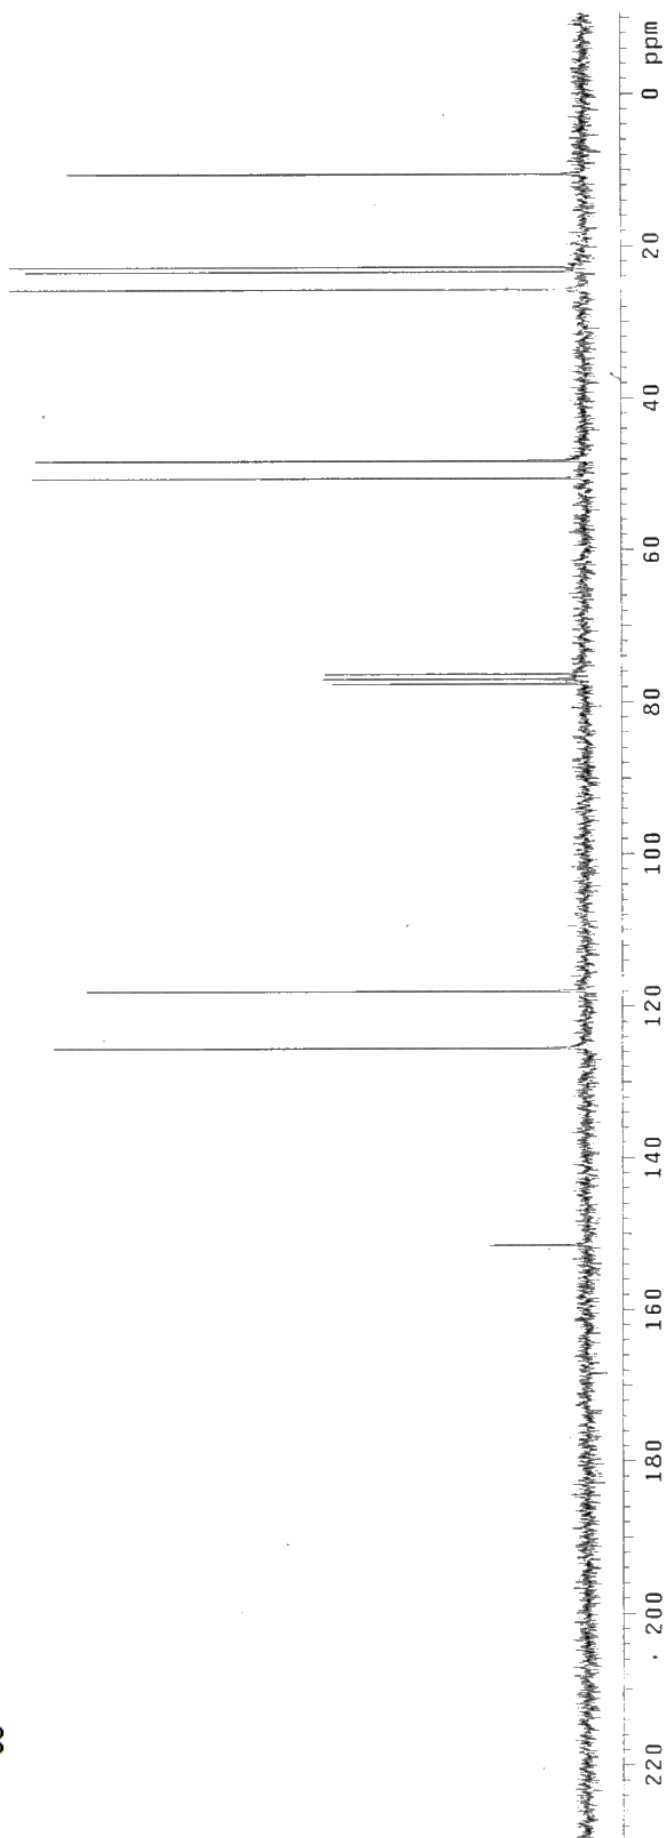

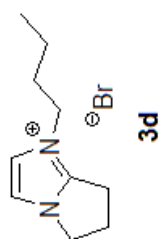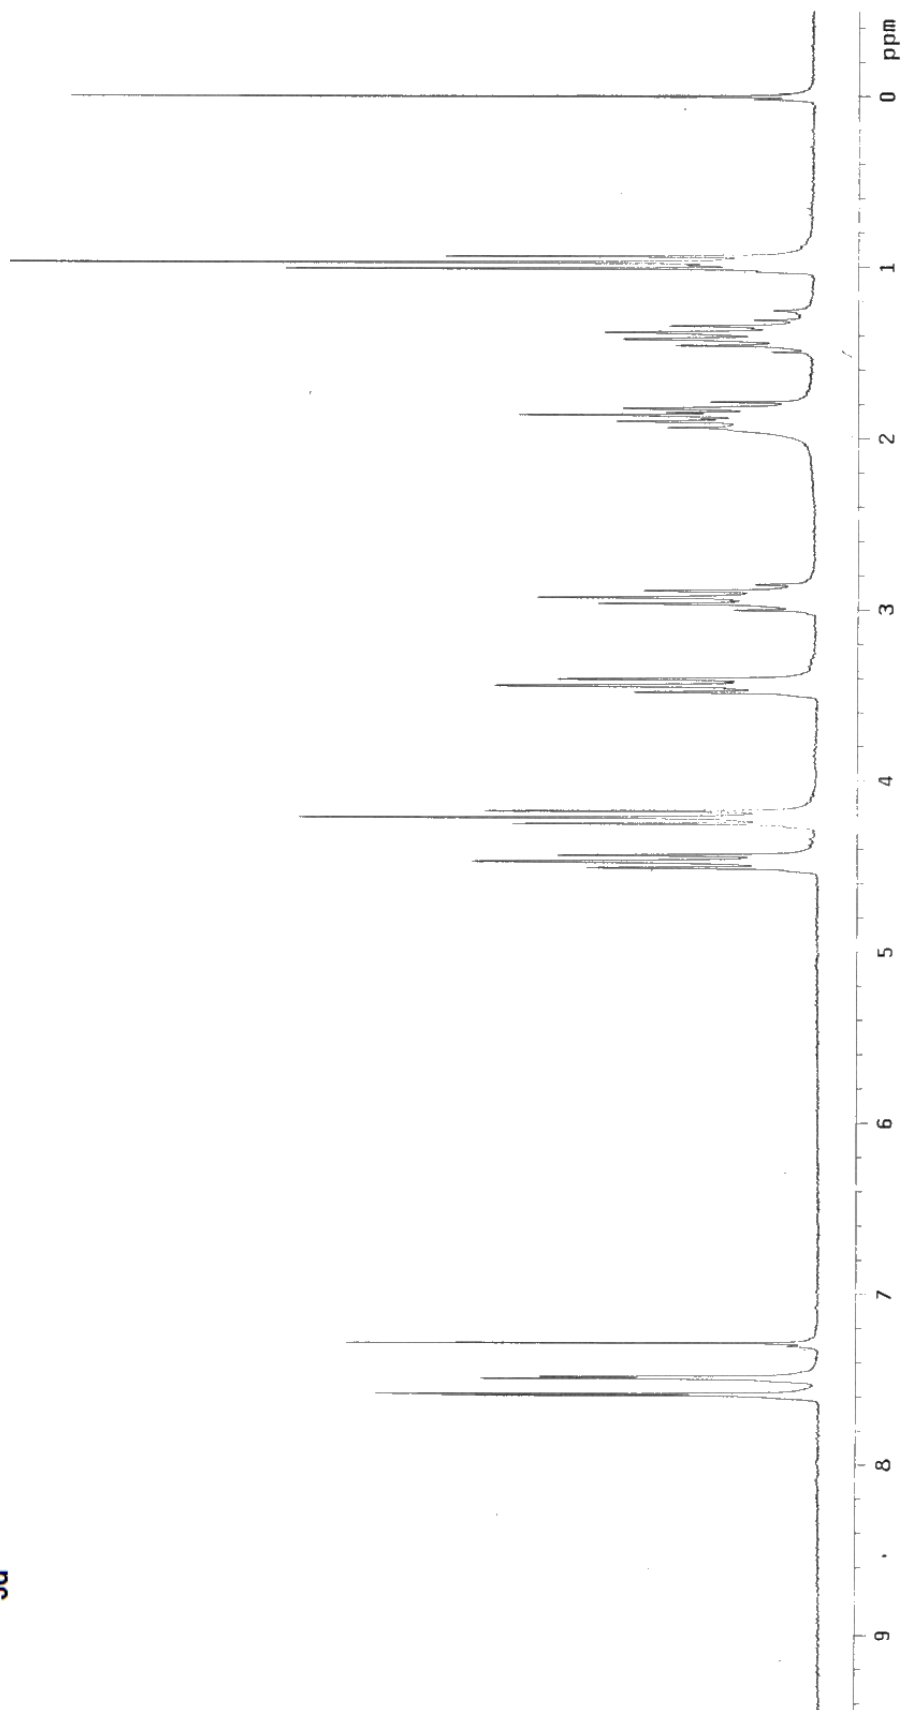

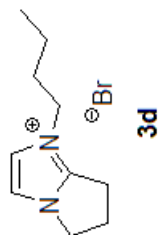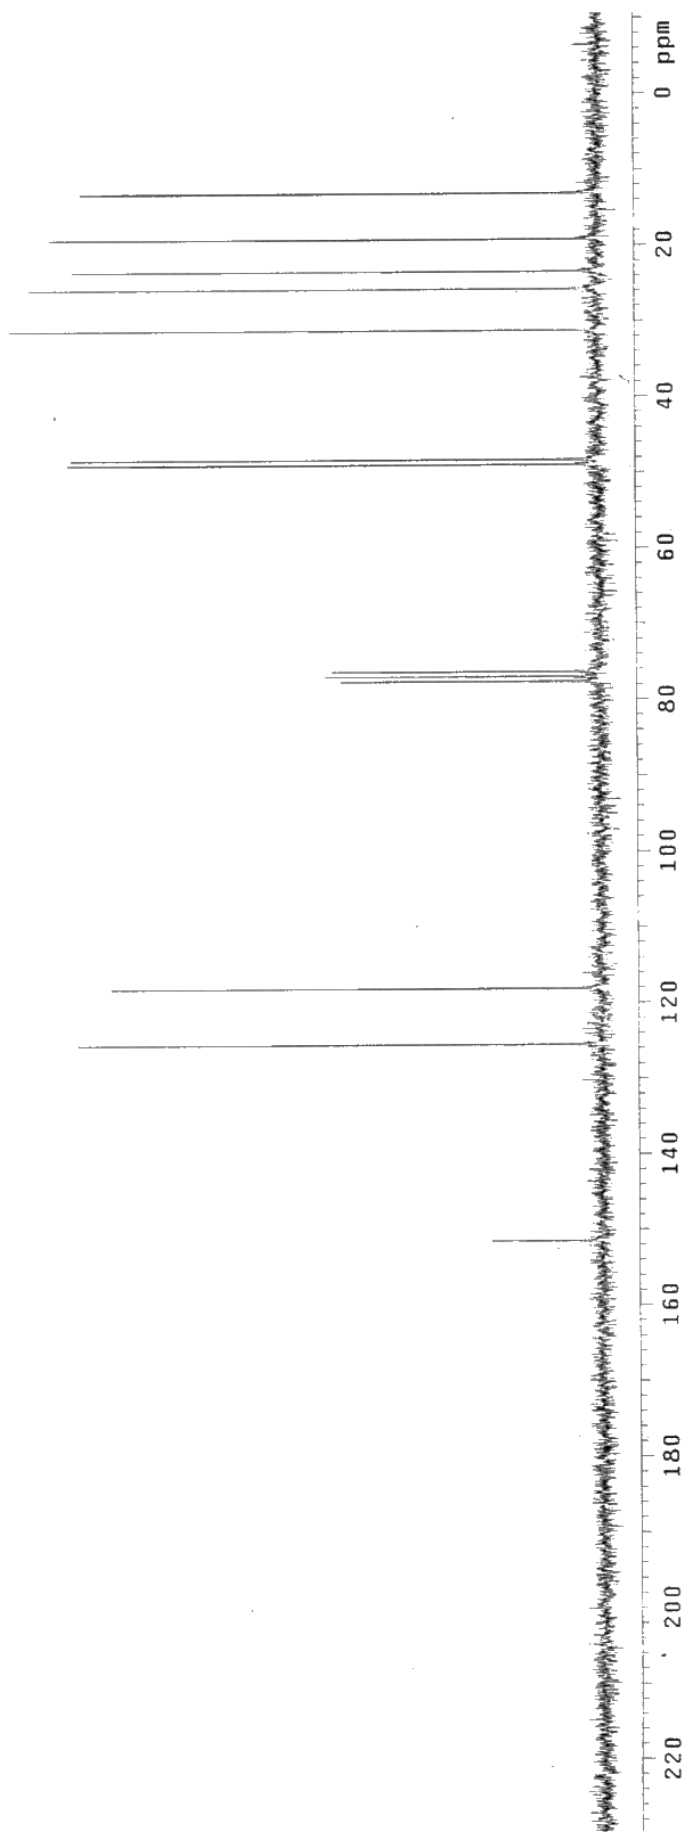

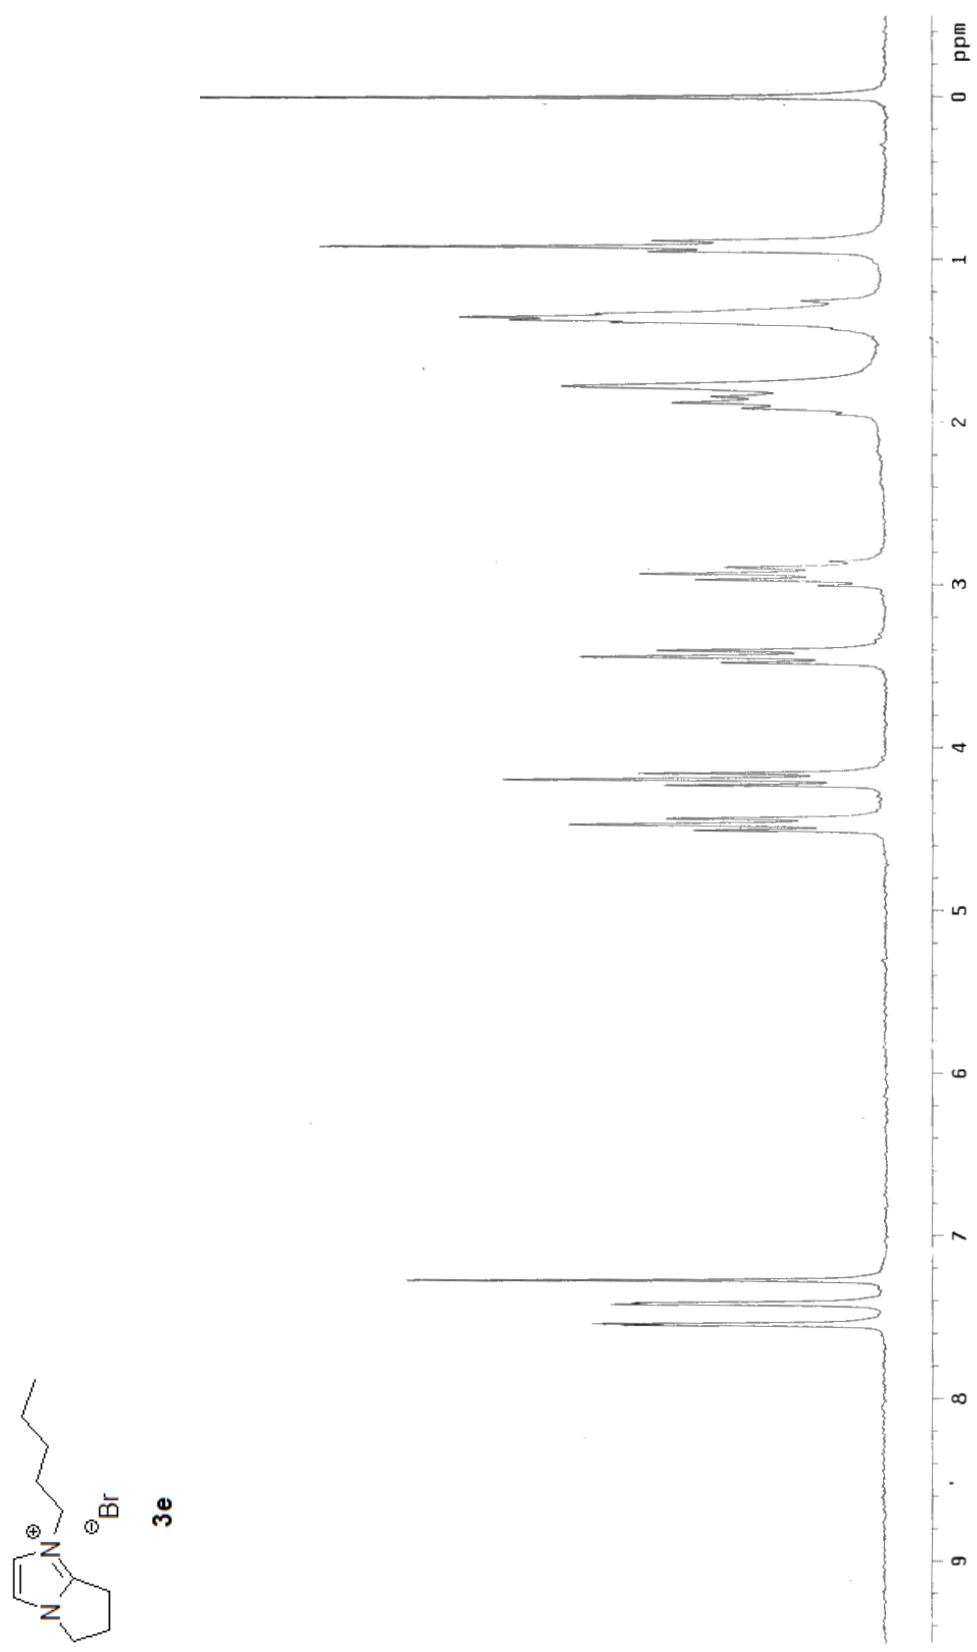

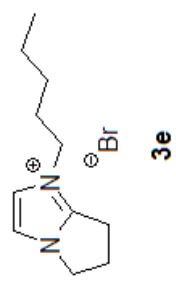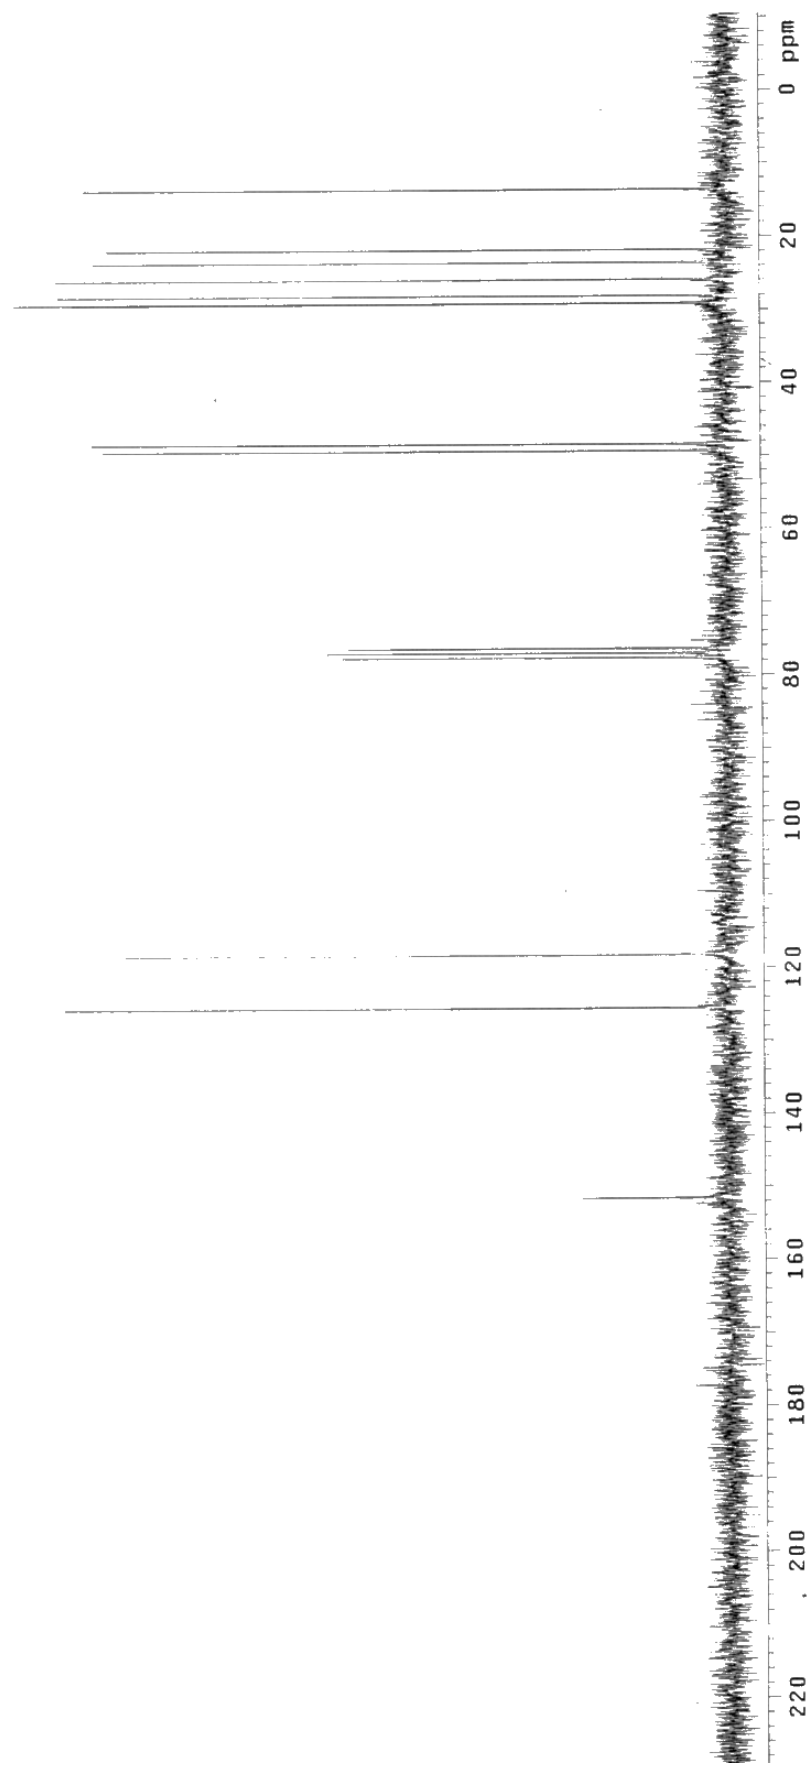

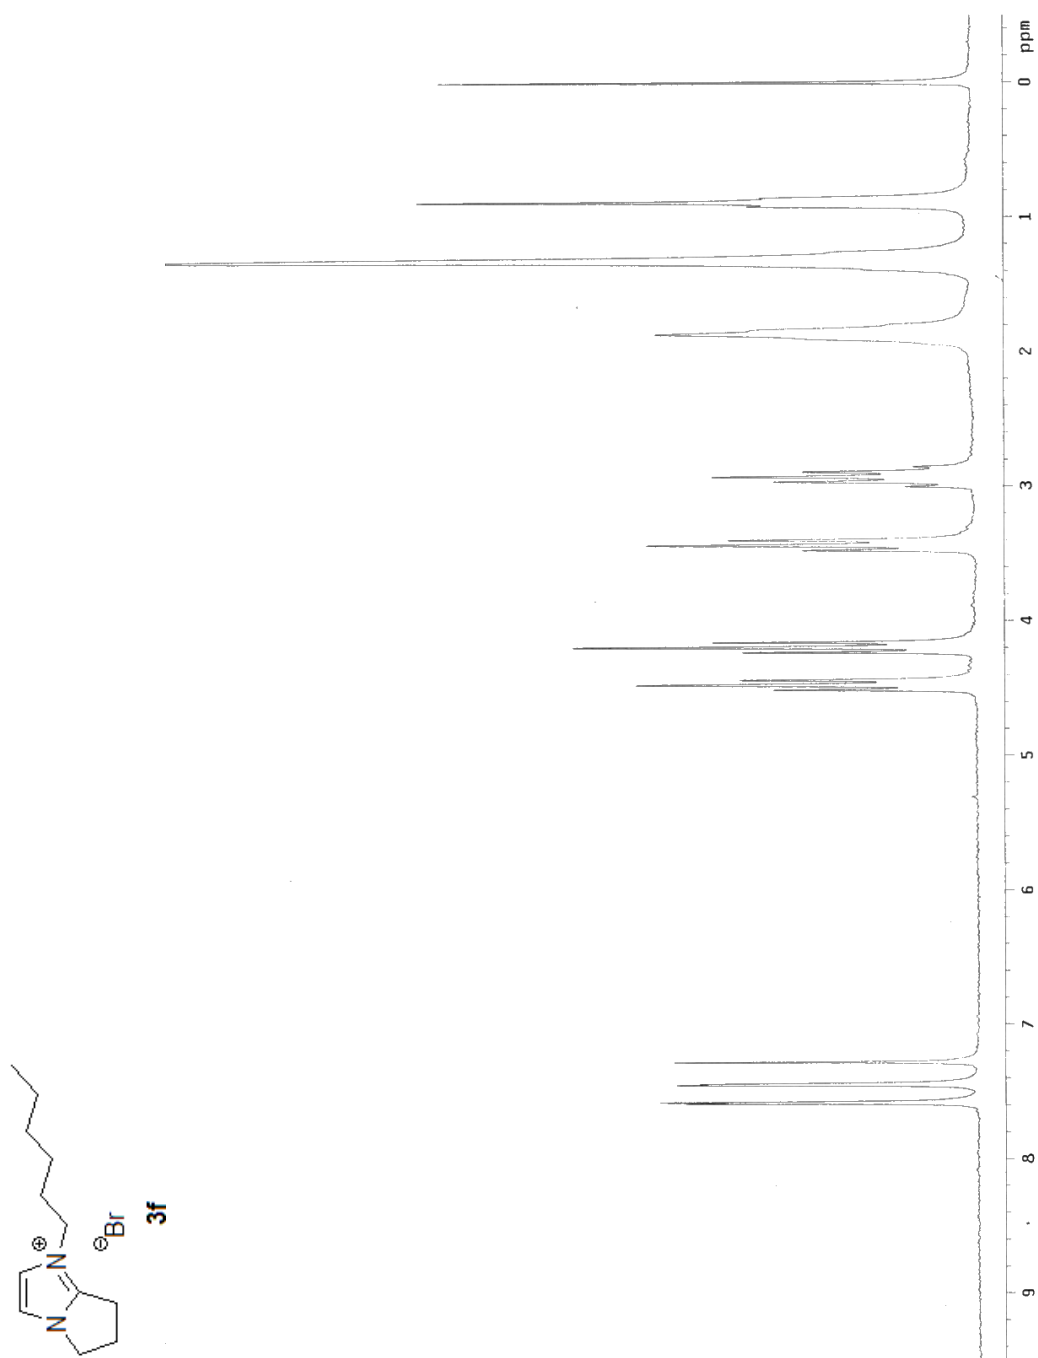

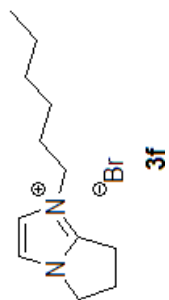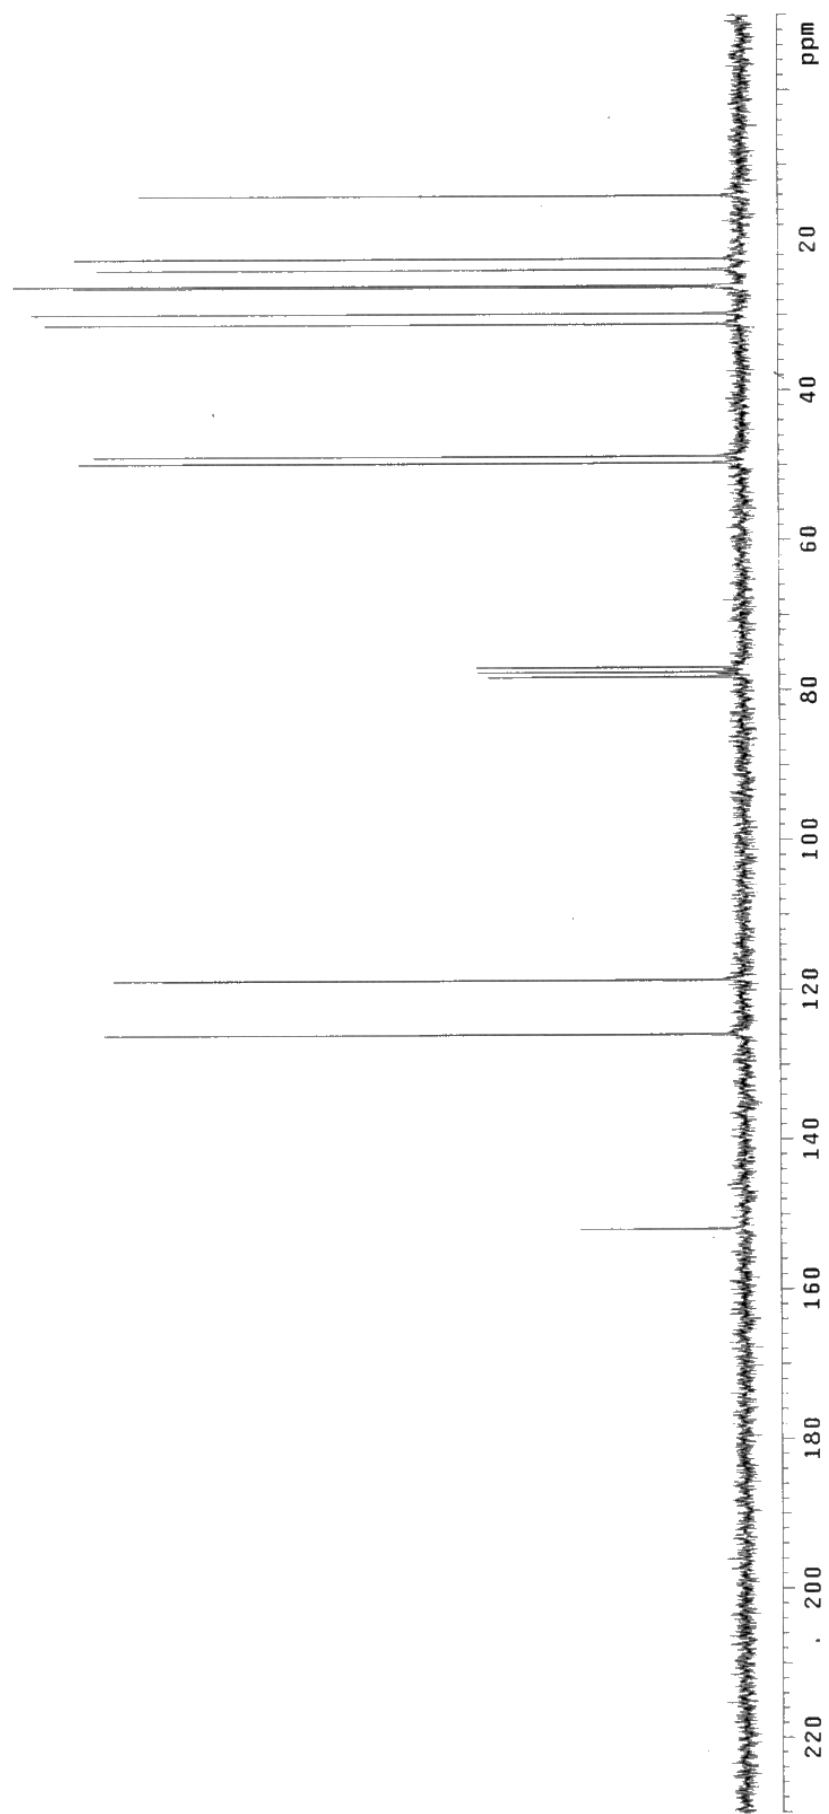

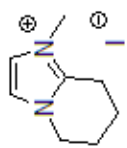

4a

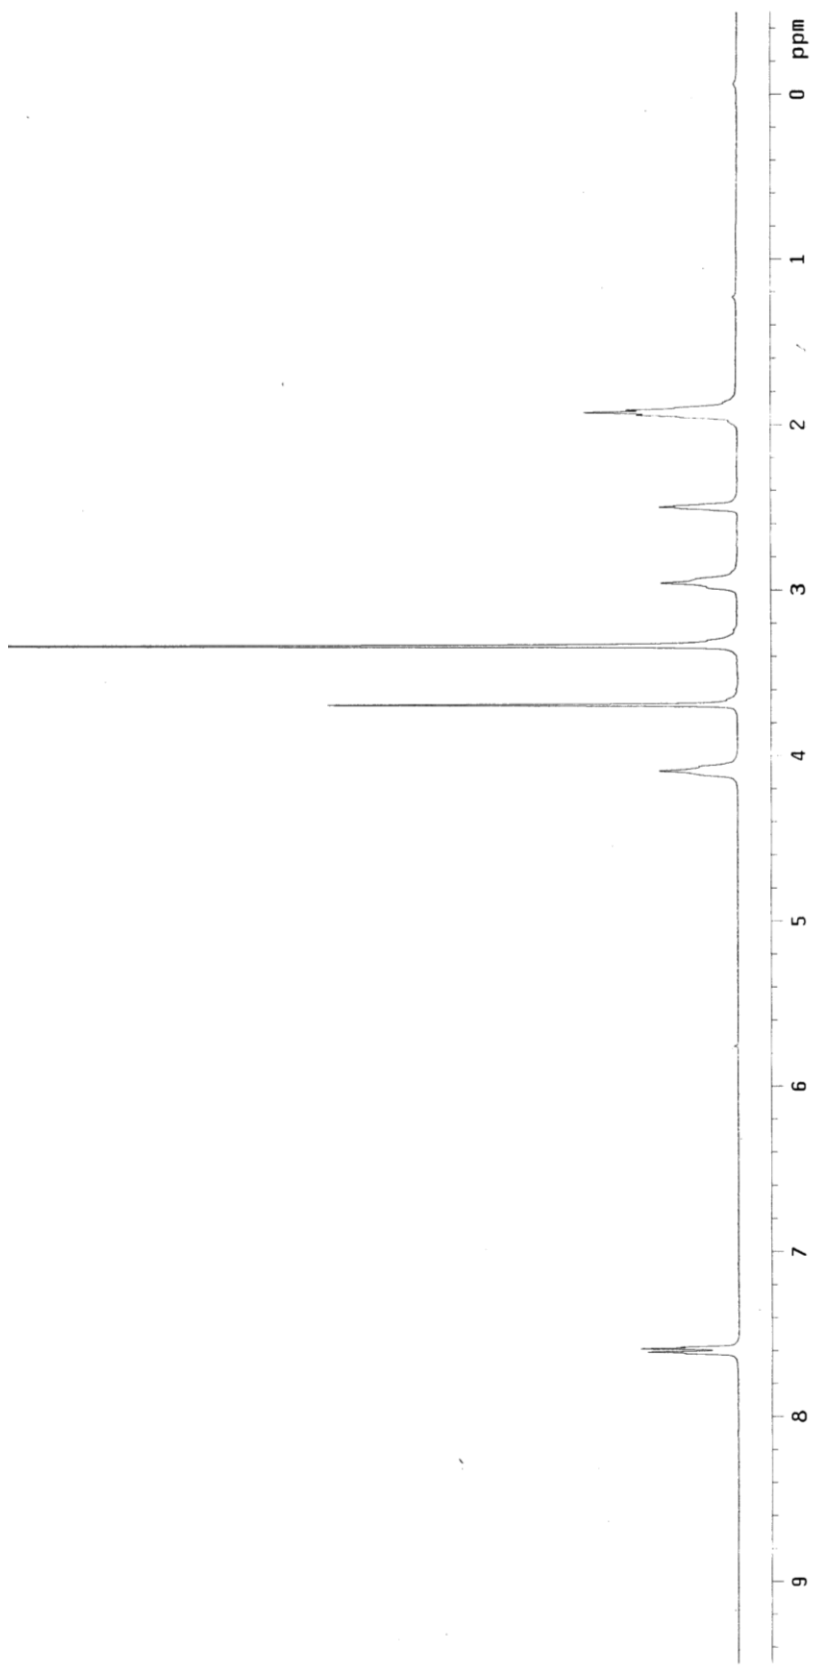



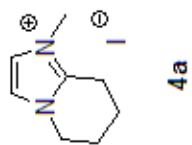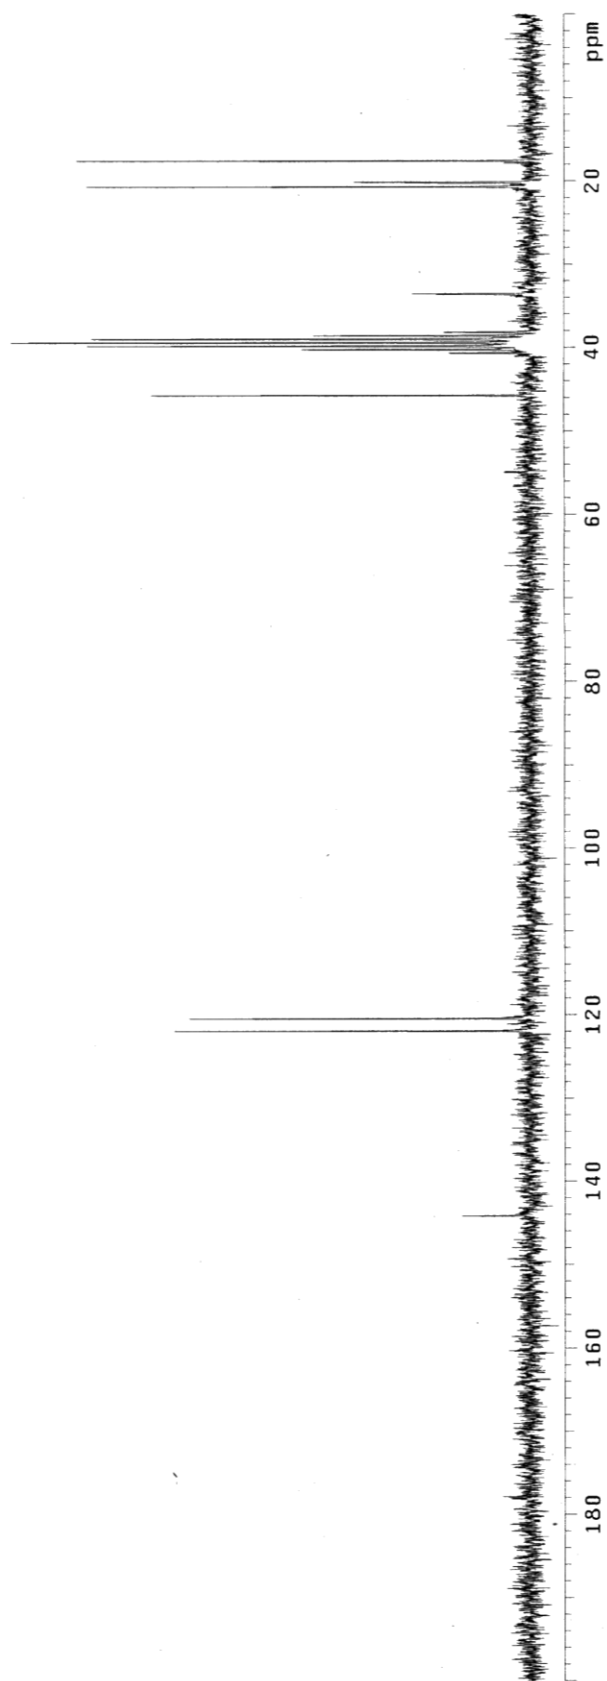

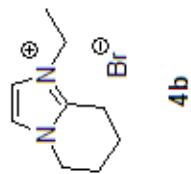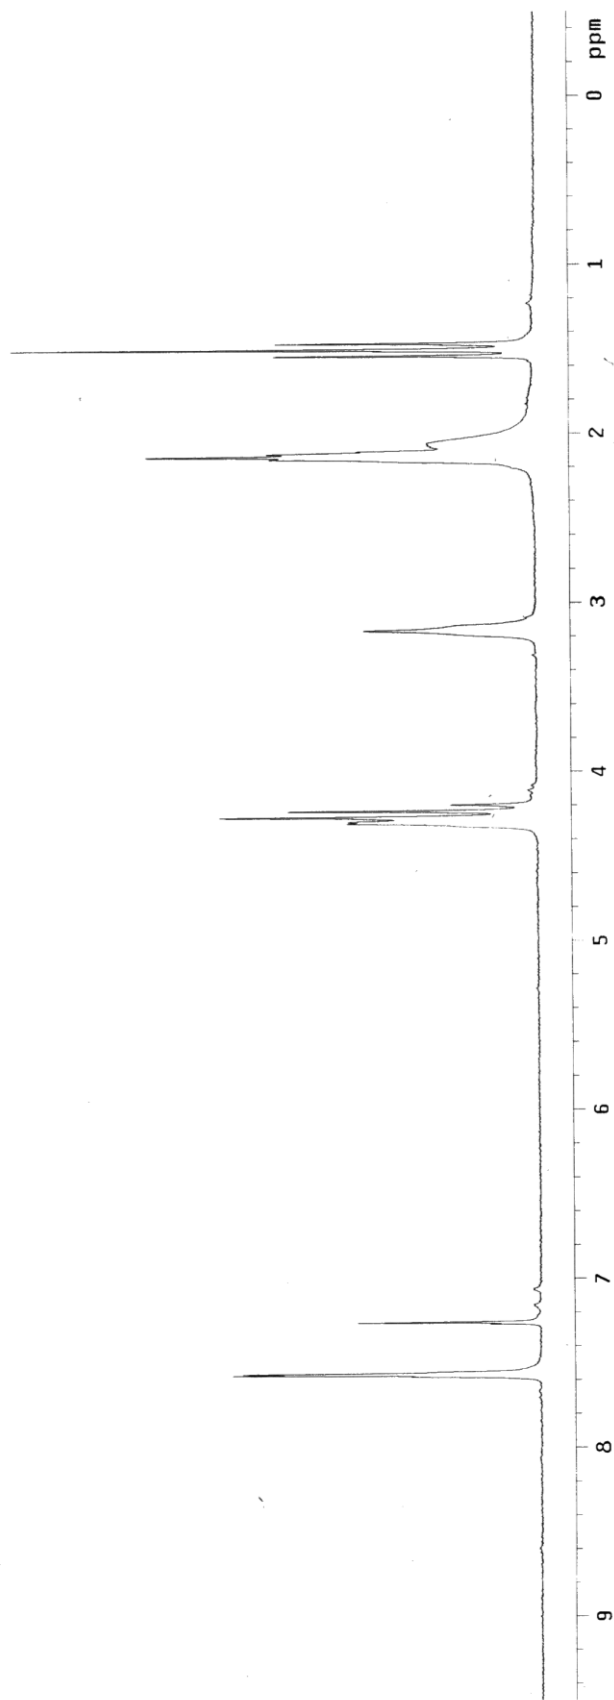

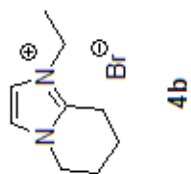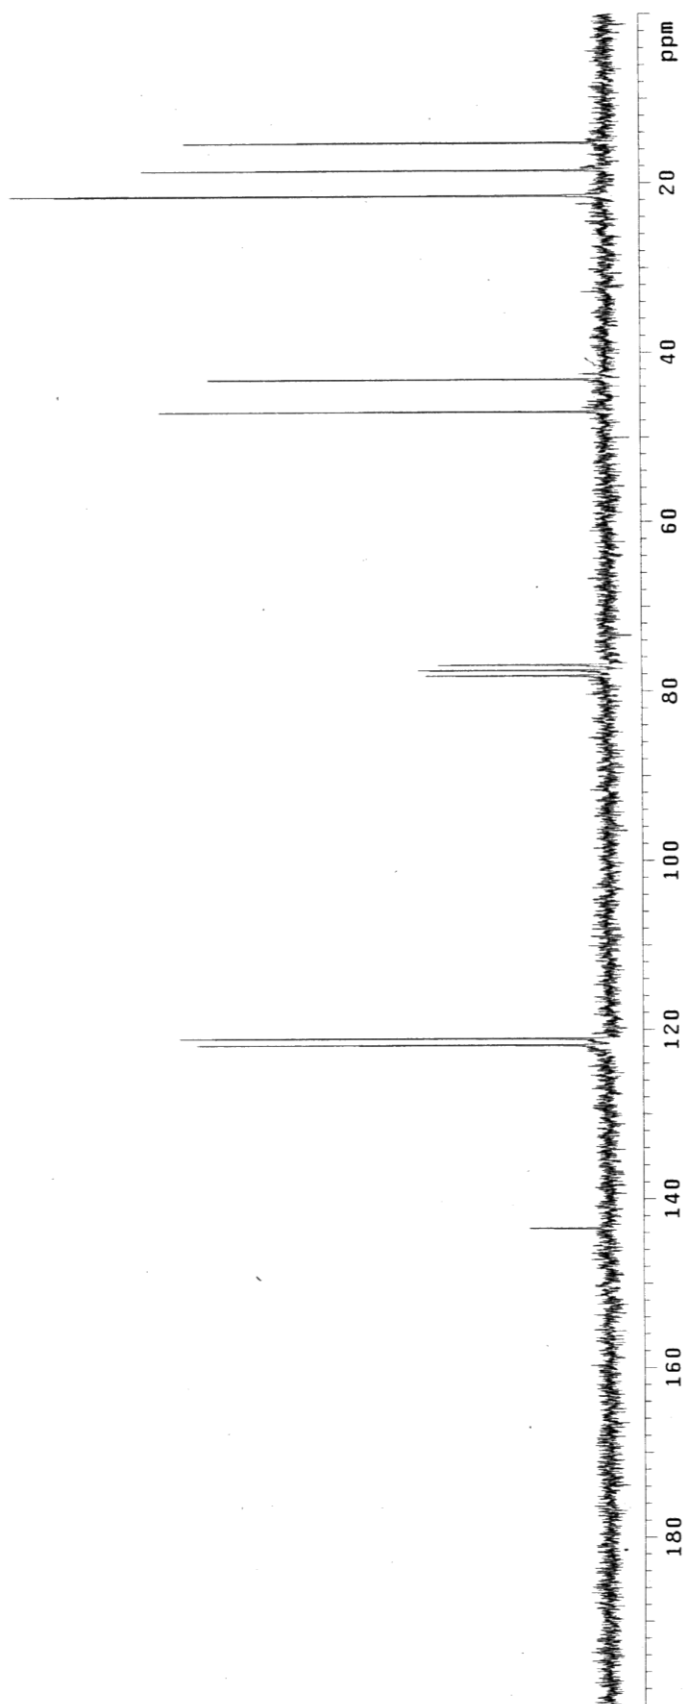

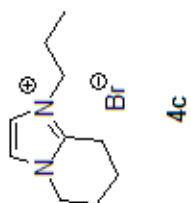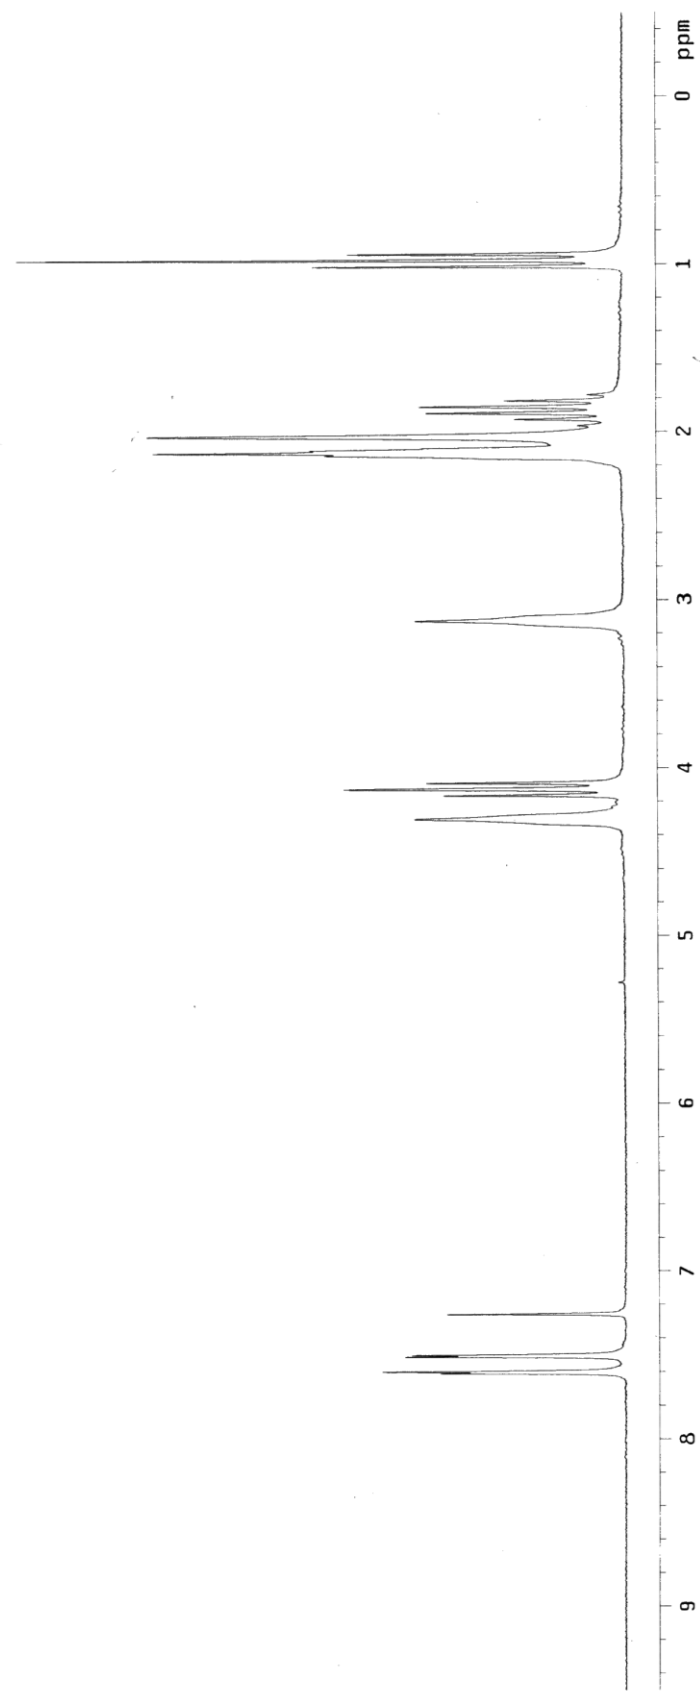

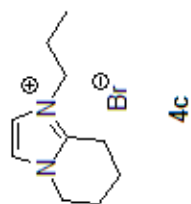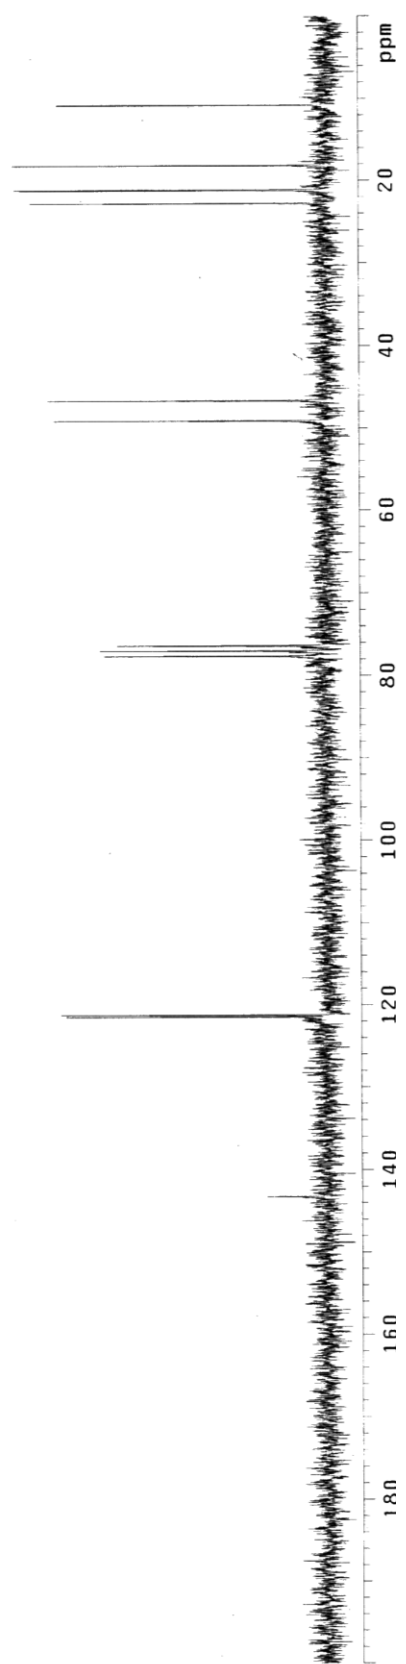

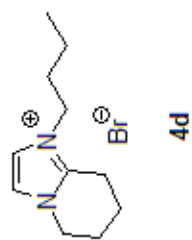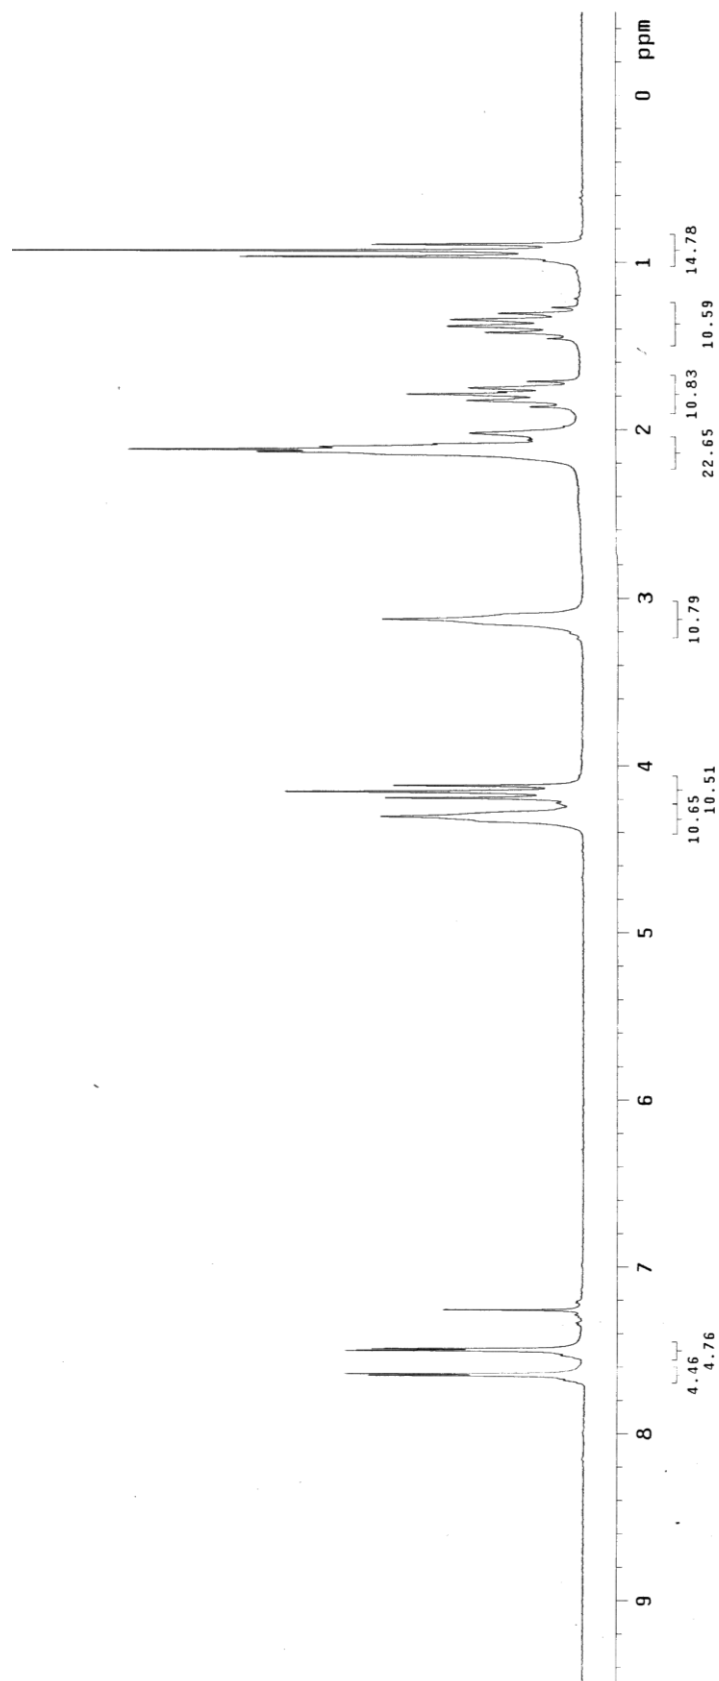

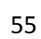

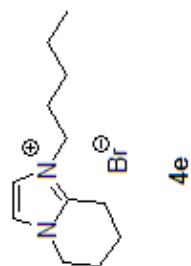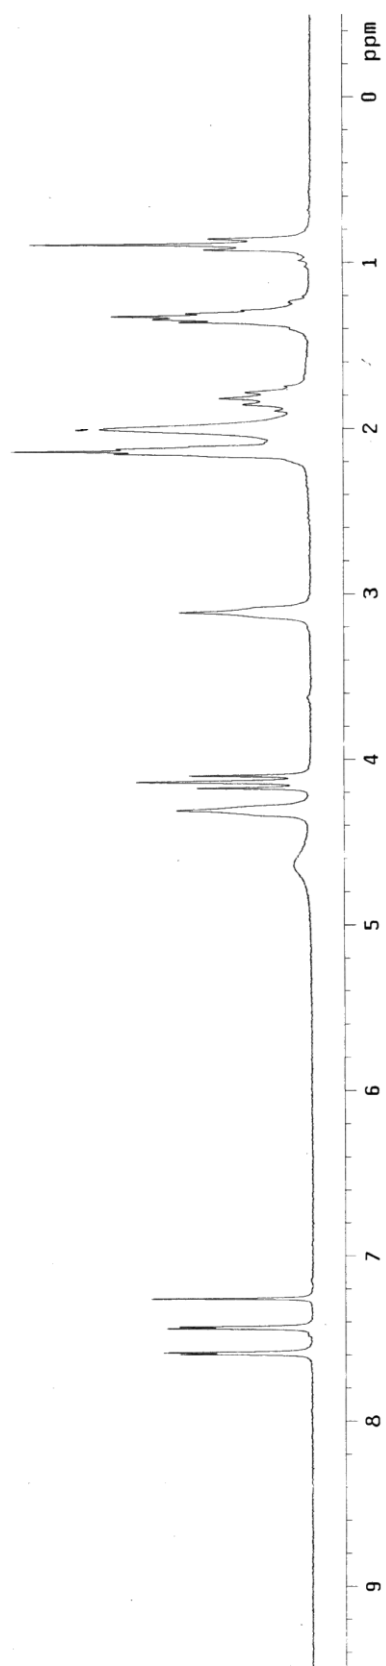



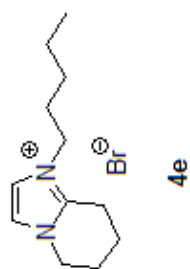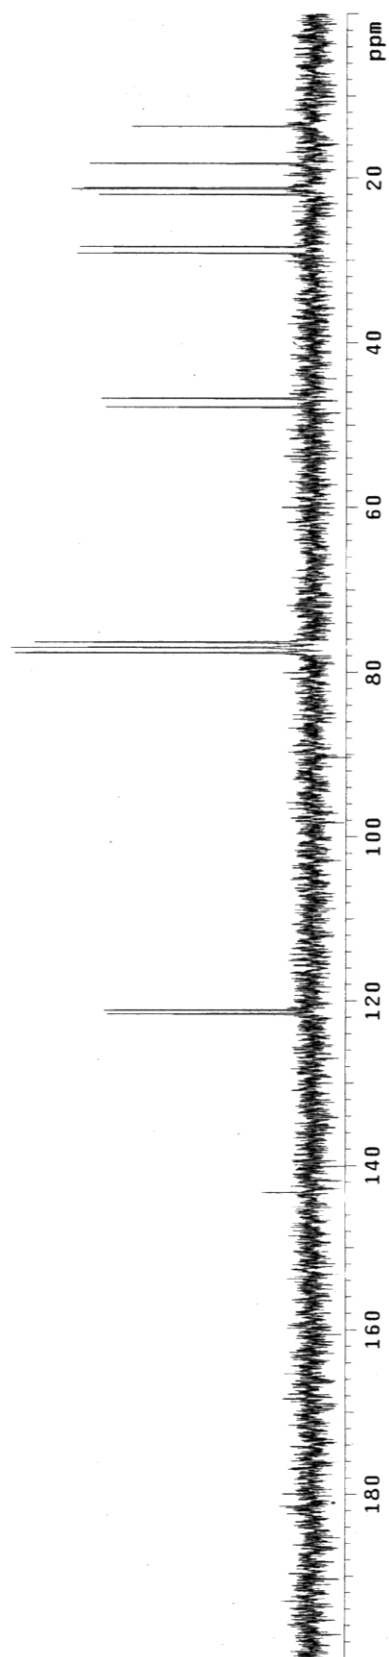

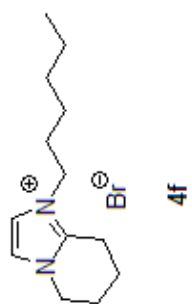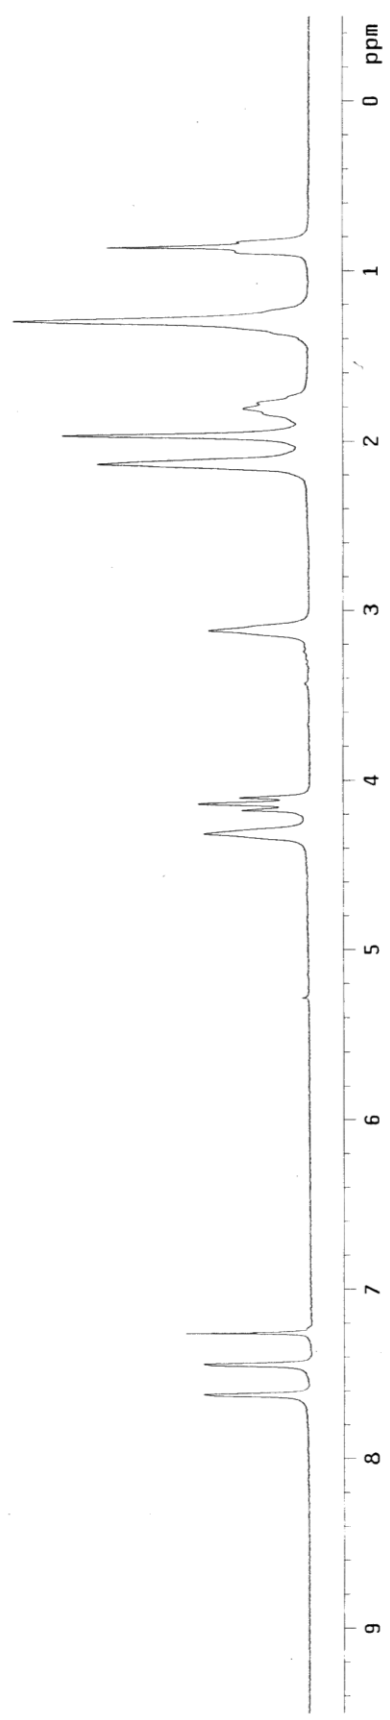

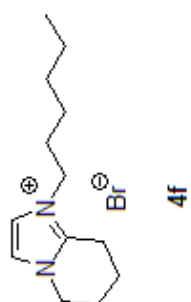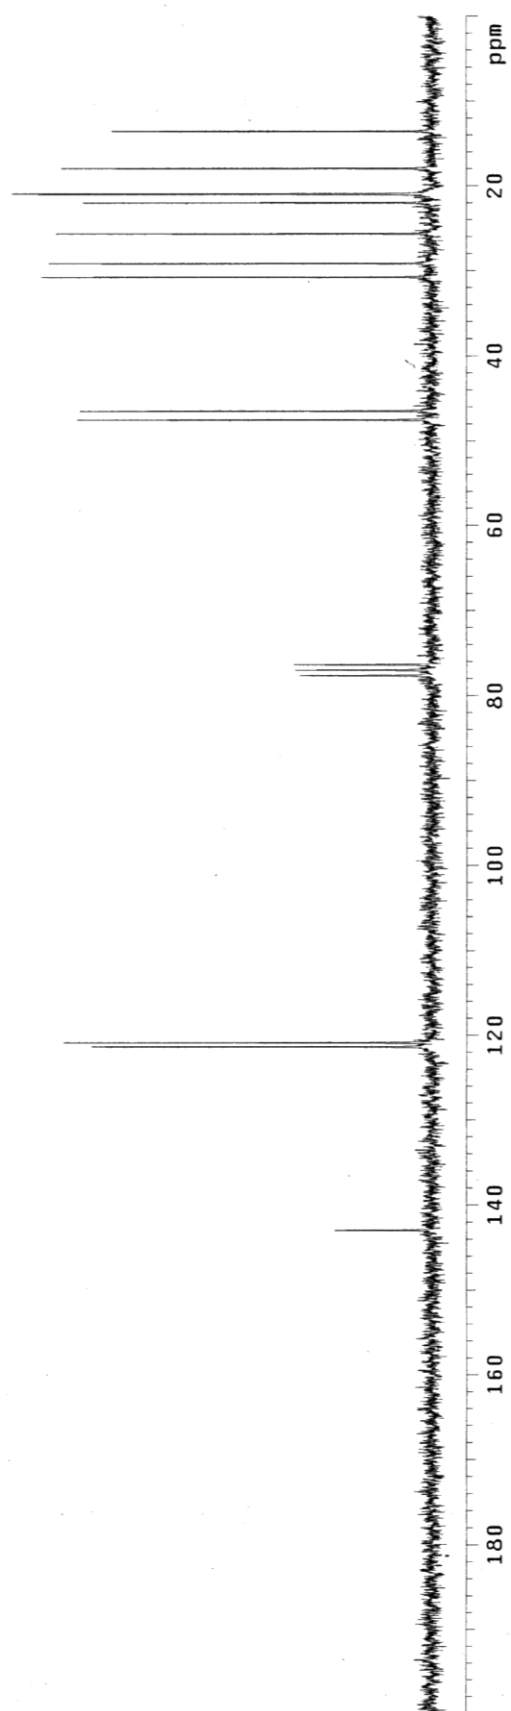

Supplement: c2cc31740k_2.pdf [file c2cc31740k_2.pdf]
